1 **Title:**

2 Mitogenomes illuminate the origin and migration patterns of the indigenous people of the  
3 Canary Islands

4

5 **Authors:**

6 Rosa Fregel<sup>1,2</sup>, Alejandra C. Ordóñez<sup>3</sup>, Jonathan Santana-Cabrera<sup>4</sup>, Vicente M. Cabrera<sup>2</sup>,  
7 Javier Velasco-Vazquez<sup>5</sup>, Verónica Alberto<sup>6</sup>, Marco A. Moreno-Benítez<sup>6</sup>, Teresa  
8 Delgado-Darias<sup>7</sup>, Amelia del Carmen Rodríguez-Rodríguez<sup>5</sup>, Juan Carlos Hernández<sup>8</sup>,  
9 Jorge Pais<sup>9</sup>, Rafaela González-Montelongo<sup>10</sup>, José M. Lorenzo-Salazar<sup>10</sup>, Carlos  
10 Flores<sup>10,11,12</sup>, M. Carmen Cruz de Mercadal<sup>7</sup>, Nuria Álvarez-Rodríguez<sup>8</sup>, Beth  
11 Shapiro<sup>13,14</sup>, Matilde Arnay<sup>3\*</sup> and Carlos D. Bustamante<sup>1\*</sup>

12 \*These authors contributed equally

13

14 **Affiliations:**

15

16 1. Department of Genetics, Stanford University, Stanford, California, United States of  
17 America.

18 2. Department of Biochemistry, Microbiology, Cell Biology and Genetics, Universidad  
19 de La Laguna, San Cristóbal de La Laguna, Spain.

20 3. Department of Prehistory, Anthropology and Ancient History, Universidad de La  
21 Laguna, San Cristóbal de La Laguna, Spain.

22 4. Department of Archaeology, Durham University, Durham, United Kingdom.

23 5. Department of Historical Sciences, Universidad de Las Palmas de Gran Canaria, Las  
24 Palmas de Gran Canaria, Spain.

25 6. Tibicena Arqueología y Patrimonio, Las Palmas de Gran Canaria, Spain.

26 7. Museo Canario, Las Palmas de Gran Canaria, Spain.

27 8. Museo Arqueológico de La Gomera, San Sebastián de La Gomera, Spain.

28 9. Museo Arqueológico Benahoarita, Los Llanos de Aridane, Spain.

29 10. Genomics Division, Instituto Tecnológico y de Energías Renovables, Granadilla,  
30 Spain.

31 11. Research Unit, Hospital Universitario N. S. de Candelaria, Santa Cruz de Tenerife,  
32 Spain.

33 12. CIBER de Enfermedades Respiratorias, Instituto de Salud Carlos III, Madrid, Spain

34 13. Department of Ecology and Evolutionary Biology, University of California Santa  
35 Cruz, Santa Cruz, California, United States of America.

36 14. Howard Hughes Medical Institute, University of California Santa Cruz, Santa Cruz,  
37 California, United States of America

38

## 39 **Abstract**

40           The Canary Islands' indigenous people have been the subject of substantial  
41 archaeological, anthropological, linguistic and genetic research pointing to a most  
42 probable North African Berber source. However, neither agreement about the exact point  
43 of origin nor a model for the indigenous colonization of the islands has been established.  
44 To shed light on these questions, we analyzed 48 ancient mitogenomes from 25  
45 archaeological sites from the seven main islands. Most lineages observed in the ancient  
46 samples have a Mediterranean distribution, and belong to lineages associated with the  
47 Neolithic expansion in the Near East and Europe (T2c, J2a, X3a...). This  
48 phylogeographic analysis of Canarian indigenous mitogenomes, the first of its kind,  
49 shows that some lineages are restricted to Central North Africa (H1cf, J2a2d and  
50 T2c1d3), while others have a wider distribution, including both West and Central North  
51 Africa, and, in some cases, Europe and the Near East (U6a1a1, U6a7a1, U6b, X3a,  
52 U6c1). In addition, we identify four new Canarian-specific lineages (H1e1a9, H4a1e,  
53 J2a2d1a and L3b1a12) whose coalescence dates correlate with the estimated time for the  
54 colonization of the islands (1<sup>st</sup> millennia CE). Additionally, we observe an asymmetrical  
55 distribution of mtDNA haplogroups in the ancient population, with certain haplogroups  
56 appearing more frequently in the islands closer to the continent. This reinforces results  
57 based on modern mtDNA and Y-chromosome data, and archaeological evidence  
58 suggesting the existence of two distinct migrations. Comparisons between insular  
59 populations show that some populations had high genetic diversity, while others were  
60 probably affected by genetic drift and/or bottlenecks. In spite of observing interinsular  
61 differences in the survival of indigenous lineages, modern populations, with the sole  
62 exception of La Gomera, are homogenous across the islands, supporting the theory of  
63 extensive human mobility after the European conquest.

64

65

## 66 **Introduction**

67           The Canaries archipelago is located off the southern coast of Morocco (Figure 1).  
68           Due to their oceanic volcanic origin, they have probably never been connected to the  
69           continent. Mediterranean sailors discovered several groups of islands in the Atlantic  
70           Ocean in the 13<sup>th</sup> century, but only the Canary Islands were found to be inhabited by an  
71           indigenous population [1]. European chroniclers recorded that different islands were  
72           inhabited by populations exhibiting different ways of life and speaking distinct dialects of  
73           what they believed to be a Berber language. Ethno-historical sources provided ethnonyms  
74           for the native population of each island (e.g. Guanches for Tenerife, Benehaoritas for La  
75           Palma, and Bimbapes for El Hierro). However, for clarity, we will refer to them in  
76           general terms, as the Canarian indigenous or native population.

77           Chroniclers were amazed to discover that the Canarian natives were unaware of  
78           navigational methods and had remained isolated from the African continent [2,3]. During  
79           the 15<sup>th</sup> century, the Spanish kingdom of Castile gradually conquered all of the Canary  
80           Islands, after previous European attempts. In most of the islands, the indigenous people  
81           resisted the European conquest [4]. The crushing of the resistance, and subsequent  
82           European colonization, had a great impact on the indigenous people [5]. In spite of the  
83           abolishment of slavery on the Islands in 1498, a large number of natives were deported  
84           during and after the conquest [6]. Those that survived and stayed progressively mixed  
85           with the European colonizers, leading to the loss of indigenous culture and language.

86           The geographic origin of the Canarian indigenous people was initially inferred  
87           from both the interpretation of historical written sources and the analysis of  
88           archaeological evidence. Most archaeological and anthropological data support a North  
89           African origin for the Canarian indigenous people, relating to the Berber populations  
90           [7,8]. Key evidence supporting a Berber origin includes inscriptions belonging to the  
91           Libyco-Berber and Lybico-Canarian alphabets [9,10], pottery [11], communal granaries  
92           [12], and domestic species [13-15]. Non-metric dental traits [16-18] and morphological  
93           analyses of cranial and long bones [19,20] also show similarities between current  
94           inhabitants of Northwest Africa and the Canarian indigenous people.

95           In regards to the time of the arrival of the first population groups, some authors  
96           have proposed the first millennium BCE as the upper bound for human presence in the

97 archipelago [21], based on radiocarbon dating of charcoal and sediment samples. In  
98 addition, there is evidence of a Roman short-stay settlement in Lobos islet dated during or  
99 before the first centuries of the present era [22], which did not, according to the  
100 archaeological data, involve attempting to colonize the Canaries. Recently, there has been  
101 an effort to review and contextualize radiocarbon dates in the Canary Islands to better  
102 assess the time of the archipelago's indigenous colonization. Accelerator mass  
103 spectrometry (AMS) analyses support a later colonisation of the Canary Islands dating to  
104 the outset of the first millennium AD. If only AMS analyses performed on short-lived  
105 samples are considered [23], the earliest dates from the eastern islands of Lanzarote and  
106 Fuerteventura range between 100-300 cal AD [21,22], whereas those from the central  
107 island of Gran Canaria range between 400-500 AD [3]. The oldest AMS dates from  
108 Tenerife are around 660-880 cal AD [24], while the western islands of La Palma, El  
109 Hierro and La Gomera yield AMS dates ranging respectively between 260-450 cal AD  
110 [24], 420-610 cal AD [24], and 120-330 cal AD [25]. On the other hand, older  
111 radiocarbon dates that place the arrival of human populations before the 1<sup>st</sup> century BCE  
112 were obtained from sediment, wood and charcoal samples that could be older than the  
113 archaeological site where they were excavated.

114 Mitochondrial DNA (mtDNA) is a powerful tool for inferring the geographic  
115 origin of populations [26]. MtDNA is maternally inherited, does not undergo  
116 recombination and its different lineages are geographically structured in human  
117 populations. For those reasons, mtDNA has been widely applied in phylogeographic  
118 studies. The analysis of current Canary Islands samples using mtDNA has provided  
119 support for a North African origin for the indigenous people, based on the presence of the  
120 mtDNA U6 haplogroup [27], which has a clear Berber ascription [28,29]. Within the U6  
121 lineages observed in the current Canary Islanders, it is worth mentioning U6b1a, a  
122 haplogroup that is not present today in North Africa and which is considered a Canarian  
123 autochthonous lineage [30]. Interestingly, U6b1a's coalescence age (3,600 years ago)  
124 predates the proposed time of arrival of the first inhabitants of the islands, suggesting an  
125 origin in North Africa [30]. Other haplogroups observed in the current Canarian people  
126 have Eurasian (H, T, J...), sub-Saharan African (L1, L2 and L3) and Amerindian (A2 and  
127 C1) affiliations [31]. These results highlighted the multiethnic nature of the modern

128 population of the Canary Islands, correlating with historical events, such as the  
129 implementation of a slave workforce for the sugar cane plantations, or the commercial  
130 connection with the Americas in the colonial period [32]. The detailed analysis of current  
131 mtDNA of the modern Canary islanders has also suggested possible origins for the  
132 indigenous population, including Morocco, Tunisia, Algeria or Sahara, but an overall  
133 agreement has not yet been reached [31,33].

134       Regarding the colonization model, linguistic research has pointed to at least two  
135 migration waves from North Africa [10,34]. Also, the observation of different cultural  
136 backgrounds affecting the island of La Palma has been interpreted as evidence of  
137 consecutive migrations. The specific timing for those migrations is still unclear, except  
138 for La Palma, where the second wave of migration has been proposed to have taken place  
139 around the 10<sup>th</sup> century [7]. This idea has also been supported by asymmetrical  
140 distribution of both mtDNA [31] and Y-chromosome lineages [35] in the modern  
141 Canarian population. The first colonization wave may have affected the entire  
142 archipelago, creating the substrate population and bringing mtDNA and Y-chromosome  
143 haplogroups observed today in most of the islands, including the mtDNA lineages U6b1a  
144 or H1cf. The second colonization would have brought new migrants to certain islands and  
145 created an asymmetrical distribution of haplogroups, such as T2c1 and U6c1.

146       The direct analysis of ancient remains from the Canary Islands, using mtDNA by  
147 means of PCR techniques, confirmed the presence of North African markers in the  
148 indigenous people, including the U6b1a haplogroup, as well as some of the Eurasian  
149 lineages observed in the modern population [36]. Admixture analysis based on mtDNA  
150 data, using the natives as parental population, determined that 42% of modern Canarian  
151 mtDNA lineages have an indigenous origin [36]. Ancient mtDNA results from four of the  
152 seven islands found high diversities for Tenerife and La Palma [33,36,37], and the partial  
153 and complete fixation of certain haplogroups in La Gomera [38] and El Hierro [39],  
154 suggesting that the colonization of the archipelago was a heterogeneous process and that  
155 different islands could have had different evolutionary histories.

156       Although previous ancient DNA (aDNA) studies have been fundamental to  
157 understanding the origin and evolution of the Canarian population, most of the ancient  
158 mtDNA data produced so far has been obtained using PCR amplification. This classical

159 aDNA technique has provided valuable information, but results have always been  
160 hindered by the risk of sample contamination. This is due to the fact that aDNA from  
161 warm climates is often extremely degraded and the PCR technique is highly sensitive,  
162 thus minute amounts of modern contaminant DNA can be preferentially amplified [40].  
163 Additionally, because the molecules are short and degraded, aDNA analyses based on  
164 PCR amplification have tended to isolate small, but informative, regions of the  
165 mitochondrial genome, such as the hypervariable region (HVR). This partial information  
166 does not allow for refined classification within haplogroups, which is needed to  
167 discriminate between close geographical regions. This is especially true within  
168 haplogroup H, which comprises ~40% of the ancient Canarian mtDNA lineages. The  
169 advent of next-generation-sequencing (NGS) has greatly expanded the capacity of aDNA  
170 research. NGS allows damage patterns that are unique to aDNA, such as short fragment  
171 size and post-mortem damage, to be detected easily, thus authenticating mtDNA results.  
172 NGS also has the advantage of providing complete mtDNA genomes to allow a better  
173 geographic assignment, compared to those obtained from partial HVR sequences.

174 A recent NGS study of the Canarian indigenous people presented the first  
175 complete mtDNA genomes and low-coverage full genomes from this population, and,  
176 more specifically, from the central islands of Tenerife and Gran Canaria [41]. However,  
177 previous aDNA data [36-39] suggested that the indigenous populations from different  
178 islands might have experienced different demographic processes. The inclusion of data  
179 from all seven islands is therefore of paramount importance to accurately characterizing  
180 the archipelago's indigenous population. Additionally, to fully benefit from the potential  
181 of ancient mtDNA data, a more detailed phylogeographic analysis is required.

182 In order to obtain a comprehensive mtDNA perspective on the origin of the  
183 indigenous people of the Canary Islands, we have applied aDNA protocols and NGS to  
184 assemble ancient mtDNA genomes from all seven sub-populations. Since human remains  
185 from warm regions like the Canary Islands are expected to have low endogenous DNA  
186 content, we applied an enrichment technique [42] to improve mtDNA coverage and  
187 reduce sequencing costs.

188

## 189 **Methods**

## 190 **Sample collection**

191 Samples were collected in collaboration with both Canarian universities, La  
192 Laguna (Tenerife) and Las Palmas de Gran Canaria (Gran Canaria), as well as the insular  
193 museums of Gran Canaria (El Museo Canario), La Palma (Museo Arqueológico  
194 Benahorita) and La Gomera (Museo Arqueológico de La Gomera). A total of 25  
195 archaeological sites were selected for this project (Figure 1). Radiocarbon calibrated  
196 dates are available for several sites (Figure S1): El Agujero (1030 - 1440 cal AD), La  
197 Angostura (1318 - 1394 cal AD), Las Arenas (540 - 650 cal AD), El Capricho (400 - 480  
198 cal AD), Cascajo (1640 - 1700 cal AD), Cuermeja (1270 - 1316 cal AD), La Fortaleza  
199 (599 – 633 cal AD), Guayadeque (540 - 737 cal AD), El Hormiguero (1020 - 1160 cal  
200 AD), Huriamen (1015 - 1050 cal AD; 1080 - 1150 cal AD), Lomo Galeón (1260 - 1290  
201 cal AD), Montaña Mina (1313 - 1365 cal AD), El Pescante (150 - 350 cal AD), Portillo  
202 (1500 - 1580 cal AD), Puente de La Calzada (1265 - 1312 cal AD; 1358 - 1388 cal AD),  
203 Punta Azul (1015 - 1155 cal AD) and El Salitre (1060 - 1179 cal AD). For those sites  
204 with no available calibrated dates (Antoncojo, Barranco Majona, El Cedro, Cueva del  
205 Agua, El Espigón, Huerto de Los Morales, Los Pasitos and Salto del Casimiro), their  
206 assignation to the indigenous population was based on general context, the archaeological  
207 remains themselves and the presence of specific funerary practices. Sample CAN.005 is a  
208 tooth sample that was taken from a private collection of ancient human remains donated  
209 to El Museo Canario (Gran Canaria, Spain). Although this sample is not associated with  
210 any specific archaeological site, its calibrated radiocarbon date (1265 - 1312 cal AD) is in  
211 agreement with a pre-Hispanic origin. It is also worth mentioning that some  
212 archaeological sites from Tenerife (Cascajo and Portillo) are from the post-conquest  
213 period [43], but they are associated with the so-called “Alzados”, indigenous people that  
214 rebelled against the European colonizers and retired to the mountains, leaving all contact  
215 with the Europeans behind [44].

216

## 217 **DNA extraction and library preparation**



218 Best-conserved samples were selected for DNA extraction. Although the petrous  
219 bone is considered the best source for aDNA [45], we used teeth and small bones (e.g.  
220 phalanx) to avoid destroying valuable archaeological material.

221 Required precautions were taken during the handling of samples, and all  
222 experiments that included aDNA were carried out in dedicated, clean lab facilities at the  
223 Paleogenomics Lab, University of California Santa Cruz, to avoid contamination. DNA  
224 extraction was performed following Dabney et al. [46]. Bone samples were sanded to  
225 remove the external surface, and then one bone piece was cut with a Dremel tool and  
226 pulverized using a bone mill. The surface of tooth samples was decontaminated using a  
227 bleach solution, and then the teeth were cut down the midline and the cementum drilled  
228 using a Dremel tool and a metallic bit. Pulverized bone and tooth samples were incubated  
229 overnight, using a proteinase K/EDTA solution, and DNA extracted using a silica-based  
230 and guanidine method. Ancient DNA was then built into double-stranded libraries, with  
231 7-bp single-index barcoding to allow for multiplexing sequencing, following Meyer and  
232 Kircher [47]. Libraries were sequenced for an initial screening on an Illumina NextSeq  
233 500 apparatus for obtaining paired-end shotgun data (~1 M reads per library) with a  
234 sequencing read length of 2 x 75 bp.

235

## 236 **Enrichment**

237 After the screening of shotgun libraries, those samples with an endogenous DNA  
238 content lower than 10% were enriched using whole-genome in solution capture [42].  
239 Briefly, aDNA libraries were captured in singleplex reactions using human genomic  
240 RNA baits, with the aim of increasing endogenous DNA rates and reducing sequencing  
241 costs. Although this method is directed at capturing the whole genome, multicopy regions  
242 of the mtDNA become particularly enriched. Post-capture libraries were sequenced as  
243 indicated before, to obtain at least ~5 M reads per post-capture library.

244

## 245 **HVR analysis**

246 In order to perform population-based analyses, we included in our study  
247 previously published [36-39] and unpublished HVR data from the seven islands. Newly

248 reported HVR data from the islands of Gran Canaria (n = 75), Lanzarote (n = 8) and  
249 Fuerteventura (n = 10) was obtained following the methodology described by Maca-  
250 Meyer et al. [36] and Ordóñez et al. [39]. Briefly, after external decontamination, tooth  
251 samples were extracted by means of a GuSCN-silica based protocol. MtDNA  
252 quantification was performed on a 7500 Real Time PCR system (Applied Biosystem,  
253 Foster City, CA, USA), using a human-specific mtDNA fluorescent probe [48], and  
254 ~3,000 copies were submitted to PCR with the aim of reducing the effects of DNA  
255 damage. The mtDNA HVRI (from positions 16,000 to 16,400) was amplified using seven  
256 overlapping fragments, with sizes ranging from 82 to 124 bp, to improve the  
257 amplification of endogenous DNA. All the sequencing reactions were prepared with the  
258 BigDye v3.1 Terminator Cycle Sequencing kit (Applied Biosystems) and run on an ABI  
259 PRISM 3130xl Genetic Analyzer (Applied Biosystems). Standard contamination  
260 prevention and monitoring were conducted as described earlier [39].

261

## 262 **Modern mtDNA genomes**

263 We included in this study several current Canary Islands mtDNA genomes,  
264 analyzed using both whole-genome and Sanger sequencing. Complete genomes were  
265 obtained in Instituto Tecnológico y de Energías Renovables (ITER) by whole-genome  
266 sequencing from a set of 18 unrelated Canarians. Briefly, DNA samples were processed  
267 with a Nextera DNA Prep kit, with dual indexes following the manufacturer's  
268 recommendations (Illumina Inc., San Diego, CA). Library sizes were checked on a  
269 TapeStation 4200 (Agilent Technologies, Santa Clara, CA) and their concentration  
270 determined by the Qubit dsDNA HS Assay (Thermo Fisher, Waltham, MA). Samples  
271 were sequenced to a depth of 30X on a HiSeq 4000 instrument (Illumina) with paired-end  
272 150-base reads. Sanger sequencing mtDNA genomes were obtained at University of La  
273 Laguna following previously published methodologies [49], for samples classified as  
274 T2c1 (determined by HVRI analysis). These samples were selected because of their  
275 potential to define new sub-lineages within T2c1. Institutional review board approval for  
276 the analysis of human subjects was obtained from Stanford University.

277

## 278 **Data analysis**

## 279 **Mapping and filtering of ancient mtDNA reads**

280 Shotgun sequencing reads were trimmed and adapters removed using  
281 AdapterRemoval version 1.5.4 [50]. Specifically, the paired-end reads were merged, and  
282 low-quality bases (BASEQ < 20) and short reads (< 30 bp) removed. Merged trimmed  
283 reads were then mapped to the human reference genome (hg19) using BWA version  
284 0.7.12 [51], while unmerged reads were discarded. Unmapped, low-quality (MAPQ<30)  
285 and duplicate reads were removed using SAMtools version 0.1.19 [52]. The percentage  
286 of endogenous DNA was calculated by dividing the number of reads remaining after  
287 filtering by the total number of trimmed reads.

288

## 289 **Authentication**

290 Damage patterns were assessed using MapDamage v2.0 [53]. Insert size of  
291 libraries was obtained with SAMtools mpileup, and plotted using R software v.3.2.0 [54].  
292 Contamination rates of libraries were calculated using contamMix v.1.0-10 [55] and  
293 Schmutzi [56].

294

## 295 **Analysis of complete mtDNA genomes**

296 MtDNA reads were directly mapped to the revised Cambridge Reference  
297 Sequence (rCRS) [57] and filtered as described before. MapDamage was used to rescale  
298 the quality of bases likely affected by post-mortem damage. Indel Realigner from the  
299 GATK pipeline version 2.5.2 was also used for improving alignment quality around  
300 indels [58]. MtDNA consensus sequences were obtained using SAMtools and BCFtools  
301 version 0.1.19 [52]. A list of variants was then obtained using SAMtools mpileup, with a  
302 minimum depth of 5. Haplogroups were determined with HaploGrep version 2.0 [59],  
303 using PhyloTree build 17 version (<http://www.phylotree.org>) [60]. MtDNA haplotypes  
304 were manually curated by visual inspection, using Tablet v.1.17.08.17 [61]. Modern  
305 DNA sequencing data was analyzed following the same protocol used for ancient  
306 samples, except for the MapDamage rescaling step. After retrieving all available mtDNA  
307 genomes belonging to the haplogroups of interest from NCBI  
308 (<http://www.ncbi.nlm.nih.gov>), phylogenetic trees were built using median-joining  
309 networks [62]. Indels around nucleotides 309, 522, 573 and 16193, and hotspot

310 mutations (e.g. 16519) were excluded from phylogenetic analysis. For estimating  
311 coalescence ages for specific clades, we used the  $\rho$  statistic [63]. We established a  
312 mutation rate for the complete mtDNA sequence of one substitution in every 3,624 years,  
313 correcting for purifying selection as in Soares et al. [64]. Accompanying standard errors  
314 were calculated as per Saillard et al. [65]. For highly frequent haplogroups, such as H1cf  
315 and T2cd3, we only kept one sample per site, to avoid relatedness interfering with  
316 coalescence age estimations.

317

### 318 **Analysis of HVRI data**

319 Newly reported HVR sequences were analyzed using BioEdit software v.7.0.9.0  
320 [66], and haplotypes were obtained by means of HaploSearch software [67] and further  
321 confirmed by manually inspecting the electropherograms. Haplogroup nomenclature was  
322 assessed following the most updated mtDNA phylotree (Build 17) [60].

323 Genome-wide data was combined with previous HVRI sequencing data to  
324 perform population-based analysis. Published samples used for comparisons are detailed  
325 in Table S1. As we do not know if samples in the same burial can be related, when  
326 several samples with the same haplogroup were observed from the same archaeological  
327 site, only one was included in the analysis. Two-tailed Fisher's exact test was used to  
328 assess differences in mtDNA haplogroup frequencies between eastern and western  
329 islands. Gene diversity was calculated according to Nei [68]. Distances between  
330 populations were estimated using haplogroup frequency-based linearized  $F_{ST}$  [69] as in  
331 Arlequin v.3.5 [70]. Multidimensional Scaling (MDS) was performed using R software  
332 and the "smacof" package [71]. Admixture estimates were calculated with the  
333 WLSAdmix program [72], which was kindly provided by Dr Jeffrey Long.

334

## 335 **Results and Discussion**

336 The average endogenous DNA content for the Canarian indigenous samples is  
337 7.92%, a relatively high value considering the warm and humid environmental conditions  
338 of the archipelago (Table S2). However, endogenous DNA values varied within and  
339 between archaeological sites, ranging between 0.02% and 39.0% (IQR= 0.67% - 11.5%).

340 All samples meet the standard aDNA authentication criteria, including observation of  
341 DNA fragmentation and damage patterns at both ends of molecules, and low modern  
342 DNA contamination rates (Figure 2). Those contamination rates calculated with  
343 contamMix are larger than those produced with Schmutzi. One possible reason is that  
344 contamMix estimations are more sensitive to low coverage values (Table S2). For  
345 example, sample CAN.033, with a 7.9X mtDNA coverage, has a contamination rate of  
346 10.2% based on contamMix and 1.0% on schmutzi. Schmutzi has been reported to be  
347 able to obtain accurate contamination rates for coverage down to ~5X [56]. However, in  
348 other cases, variable contamination estimations do not seem to be related to low  
349 coverage, and other factors may be interfering.

350 After capture, we obtained complete mtDNA genomes from 48 ancient human  
351 remains sampled in 25 different archaeological sites (Table S2). Our sample set covers  
352 the entire archipelago and a time span of 1,200 years (Figure S1). The average mtDNA  
353 depth is ~140X, with a minimum value of 8X (Table S2). Observed haplogroups agree  
354 with previous studies [33,36-39,41], indicating the presence of North African (U6),  
355 Eurasian (H, J2, T2 and X) and sub-Saharan African lineages (L1 and L3) in the Canarian  
356 indigenous population (Figure S2). As delineated before [36], the majority of  
357 haplogroups observed are of Eurasian origin, most with a Mediterranean distribution.  
358 This result is expected, as recent aDNA data from North Africa has indicated the  
359 presence of Neolithic European lineages as early as the Late Neolithic period (~5,000  
360 BP) [73].

361 We also obtained complete mtDNA genomes from a set of 18 modern Canarians  
362 (Figure S3). More than 50% of the samples belong to haplogroup H, with a higher  
363 diversity of sub-haplogroups than the one observed in the indigenous population. In  
364 addition to H1cf and H1e1a, we observe other H1 sub-lineages and other branches, such  
365 as H6a1, H3c2 or H43, which are most likely of European origin. Other haplogroups  
366 present in the indigenous people are also observed in the modern population, including  
367 J2a2d, U6b1a and X3a. In line with previous analyses [27,31], a sub-Saharan African  
368 (L3d1b3a) [74] and an Amerindian lineage (A2) [75] are observed in the current  
369 population of the Canary Islands. Assuming that our set of 48 ancient genomes is  
370 representative of the native population, we performed a rough admixture estimate of

371 27.8% of maternal lineages in members of the present-day population possessing  
372 indigenous origins, while 61.1% would be of European ascription (Figure S3).

373

## 374 **Population-based analysis**

375 In order to compare our samples to previously published data, we combined the  
376 newly generated mtDNA genomes with HVRI data from the Canarian indigenous  
377 population (Table S1) [33,36-39]. Given that sample sizes for Lanzarote and  
378 Fuerteventura are small and their indigenous populations are considered to be similar  
379 based on archaeological data [76], these data sets were pooled together. It is worth  
380 mentioning that those samples for which mitochondrial data were generated, using both  
381 classical techniques and NGS sequencing, produced identical HVRI haplotypes, proving  
382 our PCR-based approach generates authentic results.

383 As previously observed, the indigenous populations of the Canary Islands in the  
384 past were not homogenous (Table 1; Figure 3). The islands of La Palma and Tenerife  
385 show a relatively diverse mtDNA composition (>70%) [33,36,37], while the others show  
386 signs of genetic drift and/or diversity reduction events, such as a bottleneck or a founder  
387 effect. In La Gomera, mtDNA diversity was 54.2%, due to the high frequency of  
388 haplogroup U6b1a [38], while in El Hierro, this value was 2.9%, with the almost  
389 complete fixation of H1cf haplogroup in the Punta Azul site [39]. With new data on the  
390 indigenous population of Gran Canaria, Lanzarote and Fuerteventura (Table S3), we  
391 show that Gran Canaria had high mtDNA diversity, similar to Tenerife and La Palma,  
392 while Lanzarote and Fuerteventura had low diversity (51.1%) because of the high  
393 frequency of H\*(xH1cf, H4a1a) lineages. These findings emphasize that results obtained  
394 from the larger islands of Tenerife and Gran Canaria should not be extrapolated to the  
395 entire archipelago. Estimations of population sizes during pre-colonial times based on  
396 archaeological evidence agree with mtDNA results. Populations in Gran Canaria,  
397 Tenerife and, to a lesser degree, La Palma, were large and able to sustain relatively high  
398 diversity, while Lanzarote, Fuerteventura and El Hierro were almost depopulated at the  
399 time of the conquest [77]. In the case of La Gomera, the population size was also reported  
400 to be small [78].

401 By directly comparing the mtDNA types found in the indigenous population of  
402 each island, we observe that H4a1e, L3b1a, U5 and U6c haplogroups are present only in  
403 the eastern islands (Gran Canaria, Lanzarote and Fuerteventura). Differences between  
404 eastern and western islands were shown to be significant for the four haplogroups, when  
405 all the ancient samples were considered: H4a1 ( $p=0.0127$ ), L3b1a ( $p=0.0037$ ), U5  
406 ( $p=0.0114$ ) and U6c ( $p=0.0012$ ). Though also present in the western islands, haplogroups  
407 T2c1 ( $p=0.0164$ ) and U6a ( $p=0.0028$ ) appeared more frequently in the eastern islands.  
408 However, these results can be artifacts caused by the high frequency of H1cf in El Hierro  
409 and U6b1a in La Gomera. After removing these two populations from the western group,  
410 only differences in the distribution of U6c remained significant ( $p=0.0328$ ).

411 In contrast with the heterogeneity we observe in pre-Hispanic times, mtDNA  
412 haplogroup frequencies in modern populations of the Canary Islands are homogenous  
413 (Figure 3), with the sole exception of La Gomera [27]. The high frequency of haplogroup  
414 U6b1a observed in the indigenous population of La Gomera is also detected in its  
415 present-day population [38]. However, the same pattern is not observed for El Hierro. In  
416 pre-colonial times, H1cf was almost fixated in El Hierro [39], while the frequency of this  
417 haplogroup today is 4.6%, not significantly different from the average 2.4% observed in  
418 the entire archipelago ( $p=0.2364$ ).

419 In order to determine the admixture pattern at an insular level, we compared  
420 modern Canarian samples with their principal parental populations: indigenous people,  
421 Iberians, and sub-Saharan Africans (Table S1). Global admixture estimations using the  
422 new mtDNA dataset (Table 2) confirm previous results on the survival of native lineages  
423 in the modern population (55.9%). However, we observed that results within islands are  
424 variable. When the miscellaneous ancient sample is used as one of the parental  
425 populations, indigenous contribution to the modern population ranges from 30.8% in  
426 Gran Canaria to 71.4% in La Gomera. However, this approach is not correct, as we know  
427 that the indigenous population of the archipelago was heterogeneous and mtDNA  
428 frequencies were variable. With our new data, we were able to estimate admixture, using  
429 aDNA sampled directly from each island. Indigenous mtDNA contribution estimates are  
430 lower when a direct comparison is performed, with values ranging from 0% in El Hierro  
431 to 55.5% in La Gomera (Table 2). The extreme result observed in El Hierro is evidently



432 due to the marked difference between the ancient and current people. It is interesting that,  
433 when the miscellaneous sample is used, the indigenous contribution increases to 36.2%.  
434 This result is reasonable, given that the present-day sample from El Hierro is not  
435 significantly different from other islands. This can be explained if we consider that El  
436 Hierro was almost depopulated at the time of the European conquest [79]. In fact, it was  
437 recounted in the chronicles that the indigenous population of El Hierro was decimated  
438 due to razzias (raids for the purpose of capturing slaves) at the time of the Spanish  
439 conquest, and was later repopulated with indigenous populations from other islands and  
440 European colonizers [80,81].

441 To determine if a more specific origin for the Canarian indigenous population  
442 could be ascertained, the ancient mtDNA sample was combined with a reference modern  
443 DNA database containing samples from the Canary Islands, Europe, North Africa, Sub-  
444 Saharan Africa and the Near East (Table S1). In the MDS analysis (Figure 4), the  
445 indigenous sample from El Hierro and the indigenous and modern samples from La  
446 Gomera act as outliers, due to the high frequency of H1cf and U6b1a, respectively.  
447 When the two outliers were removed and all the remaining ancient samples were pooled  
448 together, the first dimension differentiates sub-Saharan populations from Eurasian  
449 populations, including North Africa and the Canary Islands. The second dimension places  
450 Canarian and European/Near Eastern populations on both ends, with North Africans in an  
451 intermediate position. The closest North African sample to the Canarian indigenous  
452 population in the second dimension is West Sahara. However, the ancient sample is  
453 differentiated from all current North African populations and placed closer to modern  
454 Canarians. This is due to the fact that haplogroups occurring frequently in the Canarian  
455 indigenous and current samples (e.g. U6b1a) are not present or appear in low frequencies  
456 within the reference populations. This result concurs with later demographic processes  
457 reshaping the mtDNA landscape of North Africa, and/or founder effects and isolation in  
458 the Canary Islands. It is interesting that, compared to the other islands, the modern  
459 populations of Tenerife and Gran Canaria are closer to the European populations. This  
460 result is expected, because they each have capital cities of the two Canarian provinces  
461 and, thus, have received substantial historical migration from the mainland.

462



## 463 **Phylogeographic analysis of mitogenomes**

464 The HVRI has been proven to be of limited value in providing a clear picture of  
465 the origin of the indigenous people of the Canary Islands. In order to conduct a better  
466 assignment of the geographic origin of the maternal Canarian indigenous lineages, we  
467 performed detailed phylogeographic analysis of all the lineages observed in the aDNA  
468 dataset (Figure S2), including those from Rodriguez-Varela et al. [41]. For detailed  
469 information on our phylogenetic analysis, see Supplementary Text.

470 We observe five different H sub-lineages in the indigenous people of the Canary  
471 Islands: H1cf, H1e1a9, H2, H3 and H4a1e. H1cf (Figure S4) seems to be restricted to  
472 both the Canary Islands and Central North Africa, and shows a coalescence age (~3,400  
473 years ago) that is in agreement with a continental origin before the colonization of the  
474 islands (Figure S5). Newly defined haplogroups H1e1a9 (Figure S6) and H4a1e (Figure  
475 S7) are both restricted to the Canary Islands, with a distribution similar to that observed  
476 for U6b1a. However, in this case, H1e1a9 and H4a1e coalescence ages overlap with the  
477 human occupation period (Figure S5) and are compatible with an origin in the islands.  
478 The presence of lineages derived of H1e1a and H4a1 in both European Neolithic and the  
479 Canary Islands indigenous samples corresponds with Eurasian prehistoric intrusions in  
480 North Africa (Fregel et al. 2018). Two samples were classified within basal H2 and H3  
481 haplogroups, preventing further phylogenetic analysis.

482 Two sublineages of haplogroup J are observed in the indigenous population of the  
483 Canary Islands: J1c3 and the newly defined J2a2d1a1. J1c3 is present in Europe, North  
484 Africa and the Near East, and more interestingly, in ancient Neolithic samples from Spain  
485 and Sardinia (Figure S8). Although J2a2d1a\* has been spotted in Central North Africa,  
486 subhaplogroup J2a2d1a1 is exclusive to the Canary Islands and Brazil, the latter  
487 representing an area with known historical migrations from the islands (Figure S9).  
488 Accordingly, this new autochthonous Canarian lineage has a coalescence age that  
489 overlaps with the indigenous occupation of the islands (Figure S5).

490 Phylogenetic analysis of the Canarian T2 sequences places them within T2b and  
491 T2c1d, two haplogroups thoroughly observed in Neolithic and Bronze Age sites from  
492 Europe. The inclusion of ancient and modern Canarian samples allows us to define four  
493 new T2c1d subhaplogroups (Figure S10). T2c1d3 haplogroup is present in both Tunisia

494 and the Canary Islands. T2c1d1c1 and its two subclades (T2c1d1c1a and T2c1d1c1b) are  
495 present in both North Africa and the current population of the eastern Canary Islands.  
496 This distribution could be explained by an asymmetrical migration pattern, or, given its  
497 absence in the indigenous people, by a higher impact of Moorish slave trade in the  
498 eastern islands (Supplementary Text).

499 We identify several indigenous samples within macrohaplogroup L, belonging to  
500 L1b1a and the newly defined L3b1a12. Although Later Stone Age [82], and Early and  
501 Late Neolithic [73] samples from North Africa did not show any mtDNA lineage of sub-  
502 Saharan origin, our results imply the presence of L1b and L3b1a in North Africa at the  
503 time of the colonization of the Canary Islands. Regarding L3b1a12 (Figure S11), this  
504 lineage can also be considered autochthonous of the Canary Islands, with a coalescence  
505 age posterior to the proposed colonization date (Figure S5). Interestingly, this lineage was  
506 only present in the eastern islands in ancient times, but has a wider distribution at the  
507 present time, suggesting extensive movement of native people after the conquest.

508 Canarian indigenous sequences belonging to X haplogroup are classified within  
509 the X3a clade (Figure S12). This lineage is present both in Europe, the Near East and  
510 northeast Africa, as well as in the ancient and current populations of the Canary Islands.

511 Finally, several U6 sublineages are observed in the indigenous population of the  
512 Canary Islands, including U6a1a1 (Figure S13), U6a7a1 (Figure S14), U6b1a (Figure  
513 S16) and U6c1 (Figure S16). U6a1a1, U6a7a1 and U6c1 are present in the Maghreb,  
514 southern Europe and the Canary Islands, and are most probably related to prehistoric  
515 Mediterranean expansions (Figure S13, Figure S14 and Figure S16). As reported before,  
516 the Canarian autochthonous U6b1a is also present in regions with recent Canarian  
517 migration, including mainland Spain and Cuba (Figure S15). Given its coalescence age  
518 and the oldest calibrated radiocarbon dates from human remains from the Canary Islands  
519 (Figure S5), U6b1a most probably originated in North Africa and later migrated to the  
520 Canaries. However, to date, this lineage has not been observed in the continent,  
521 indicating the migrations occurred after the colonization of the Canary Islands reshaped  
522 the North African mtDNA landscape.

523

524

## 525 **Discussion**

526 Our mtDNA results on the indigenous people of the Canary Islands shed light on  
527 the prehistory of North Africa. Our data are in agreement with recent aDNA data from  
528 Morocco [73] and further evidence of a complex pattern of Mediterranean migrations in  
529 North Africa. Archaeological records in the Maghreb support this result, and also suggest  
530 further European intrusions during the Chalcolithic and Bronze Age eras [83,84].  
531 Additionally, Phoenicians, Carthaginians and Romans arrived in the North African region  
532 in historical times [85-88]. The presence of haplogroups of Mediterranean distribution in  
533 the indigenous people of the Canaries demonstrates the impact of these prehistoric and  
534 historical migrations in the Berbers and that they were already an admixed population at  
535 the time of the indigenous colonization of the islands [89].

536 In our phylogeographic analysis of complete mtDNA sequences from the  
537 Canarian indigenous population, we found lineages that are only observed in Central  
538 North Africa and the Canary Islands (H1cf, J2a2d and T2c1d3), while others have a  
539 wider distribution including both West and Central North Africa, and, in some cases,  
540 Europe and the Near East (U6a1a1, U6a7a1, U6b, X3a, U6c1). These results point to a  
541 complex scenario, where different migration waves from a dynamic and evolving North  
542 African population reached the islands over time. Every island experienced their own  
543 evolutionary path, determined by the environmental conditions and limitations of  
544 insularity. Those islands with the capability of sustaining large populations retained  
545 variability, while others with more restricted means (La Gomera and probably El Hierro)  
546 had to develop cultural practices to avoid inbreeding, like mandatory exogamic practices  
547 [78,90].

548 Although the North African Berber origin is the most widely accepted hypothesis,  
549 other lines of research have proposed that certain funerary practices and religious beliefs  
550 observed in the indigenous population of the Canary Islands could be linked to Punic-  
551 Phoenician influence [91], thus proposing the colonization of the Canary Islands as the  
552 result of Phoenicians expanding their control to the Atlantic Ocean. Based on the limits  
553 of the territorial occupation of the Atlantic West Africa by Phoenicians, Carthaginians  
554 and Romans, most researchers consider it unlikely that there was a political occupation or  
555 economic exploitation of the archipelago [92-94]. However, the islands were not

556 unknown to Mediterranean cultures, and Romans possessed the seafaring skills needed to  
557 travel to the islands [22]. Some authors think Phoenicians also had the navigational  
558 technology required to reach the Canary Islands [95,96], although this idea has been  
559 challenged [97]. The first Phoenician aDNA sample published was a complete mtDNA  
560 sequence of a child from Carthage dated to the 6<sup>th</sup> century BC [98]. This Carthaginian  
561 sample was classified within U5b2c1 haplogroup. This result is interesting, given that U5  
562 was more frequent in the indigenous population of the eastern islands, including the  
563 island of Lanzarote, where a Punic-Phoenician influence has been proposed. As U5  
564 haplogroup was not uncommon in Neolithic European samples, and its presence in North  
565 Africa might be due to prehistoric migrations, an alternative explanation would be that  
566 haplogroup U5 was incorporated into the Berber mtDNA pool before the Carthaginians  
567 were established in Tunisia. Recently, Matisoo-Smith et al. [99] published thirteen  
568 complete mitogenomes from Punic-Phoenician samples from Lebanon and Sardinia. The  
569 only haplogroups in common with the indigenous population of the Canary Islands are  
570 H3 and H1e1a, although, in this case, the Phoenician H1e1a sample is classified within  
571 the sub-lineage H1e1a10. The lack of overlap between the mtDNA composition of  
572 Phoenicians and the Canarian indigenous people disagrees with either a Punic-Phoenician  
573 origin for the ancient islanders or sustained contact between the two populations.

574 Previous genetic analyses of the modern Canarian population detected an  
575 asymmetrical distribution of maternal and paternal lineages in the archipelago [31,35].  
576 Our aDNA results confirm the existence of asymmetrical distribution of mtDNA  
577 haplogroups in pre-colonial times, with the presence of haplogroups H1e1a9, H4a1e,  
578 L3b1a12 and U6c1 only in the eastern islands. However, it is worth mentioning that La  
579 Palma, the island with the most anthropological evidence of two migrations waves, does  
580 not show any of these lineages. If we consider the presence of H1e1a9, H4a1e, L3b1a12  
581 and U6c1 haplogroups to be the result of further population movements from North  
582 Africa to the eastern islands, we could approximate the date based on radiocarbon dates  
583 of the sites where the sample was taken. Most sites where these lineages have been  
584 observed have radiocarbon dates placed around the 13<sup>th</sup> century, and all except one are  
585 from after the 10<sup>th</sup> century. The only site with an older date is Guayadeque; however, we  
586 have to take into account that this is a large site, with evidence of human occupation

587 extending until the 14<sup>th</sup> centuries AD [100], and the dating was not performed directly on  
588 the analyzed sample.

589 Archaeological data has evidenced significant changes in the productive strategies  
590 of some islands around the 11<sup>th</sup> - 12<sup>th</sup> centuries [12,76,101-103]. In fact, recent data  
591 indicates probable population growth in Gran Canaria at that time, suggesting the  
592 appearance of new settlements associated with an exploitation model that intensified the  
593 use of marine resources, the increase in the size of settlements linked to agricultural  
594 nuclei, and changes in the production of some craftsmanships [12,104,105]. These  
595 changes have been interpreted as part of an endogenous process, as it has been  
596 determined that this population growth involved neither significant changes in the  
597 structure of human settlements or burials, nor introduced differences in land management  
598 or the types of domestic species that were exploited. However, it is also possible to  
599 explain those changes as the result of the arrival of new migrants to the island of Gran  
600 Canaria. Although it is still under study, there is evidence for transformations in the  
601 configuration of some settlements in Lanzarote, between the 8<sup>th</sup> and 13<sup>th</sup> centuries [106].  
602 Again, these modifications could be reflecting changes in the conception of domestic  
603 space due to an endogenous process, or associated with the arrival of new colonizers.  
604 Archaeological information from Fuerteventura is not abundant enough to determine  
605 population size changes that could be related to the arrival of new migrants. Nevertheless,  
606 it is clear from the archaeological record that Fuerteventura and Lanzarote maintained  
607 frequent contact and shared both cultural and economic elements [76,107]. Future  
608 paleogenomic efforts to obtain high-coverage genomes from all seven islands, in  
609 combination with proper archaeological contextualization of the genetic data and detailed  
610 radiocarbon dating, will be essential for improving our knowledge of the origins and  
611 evolution of the indigenous population of the Canary Islands.

612

#### 613 **DATA AVAILABILITY:**

614

615 Mitochondrial DNA sequence data are available through the European Nucleotide  
616 Archive (PRJEB29569). Consensus mtDNA sequences are available at the National  
617 Center of Biotechnology Information (Accession Numbers MK139577 - MK139649).

618 Requests for additional materials should be addressed to R.F. (e-mail:  
619 rfregel@ull.edu.es).

620

621 **ACKNOWLEDGMENTS:**

622

623 C.D.B. and R.F. were funded by a grant from the National Science Foundation (1201234)  
624 and the Chan Zuckerberg Biohub Investigator Award; R.F. was funded by a Fundación  
625 Canaria Dr. Manuel Morales Fellowship and by a grant from Dirección General de  
626 Patrimonio Cultural del Gobierno de Canarias (MITOCAN); B.S. was funded by a grant  
627 from the Gordon and Betty Moore Foundation (GBMF-3804); R.G.M., J.M.L.S and C.F.  
628 were funded by grants from the Spanish Ministry of Science and Innovation (RTC-2017-  
629 6471-1) and Área Tenerife 2030 from Cabildo de Tenerife (CGIEU0000219140), and  
630 from the agreement OA17/008 with Instituto Tecnológico y de Energías Renovables  
631 (ITER). Finally, C.F. wants to acknowledge technical assistance from Ana Díaz-de-  
632 Usera.

633 **REFERENCES**

634

- 635 1. Farrujia de la Rosa J (2014) An archaeology of the margins: colonialism, amazighity  
636 and heritage management in the Canary Islands. New York: Springer.
- 637 2. Navarro JF (2005) Todo sobre Canarias: Los aborígenes. Santa Cruz de Tenerife:  
638 Centro de la Cultura Popular Canaria.
- 639 3. Velasco-Vázquez J (2015) Más allá del horizonte: Una “perspectiva humana” del  
640 poblamiento de Canarias. In: Farrujía de la Rosa J, editor. Orígenes Enfoques  
641 interdisciplinarios sobre el poblamiento indígena de Canarias. Santa Cruz de  
642 Tenerife: Thesaurus Arqueología, Ediciones Idea. pp. 23-89.
- 643 4. Rumeu de Armas A (2006) La conquista de Tenerife (1494-1496). La Laguna:  
644 Instituto de Estudios Canarios.
- 645 5. Crosby AW (1988) Imperialismo ecológico. La expansión biológica de Europa 900-  
646 1900. Barcelona: Ed. Crítica.
- 647 6. Suarez JJ, Rodríguez F, Quintero CL (1988) Historia popular de Canarias. Vol. 2.  
648 Conquista y Colonización: Centro de la Cultura Popular Canaria.
- 649 7. Navarro JF (1997) Arqueología de las Islas Canarias. Espacio, tiempo y forma Serie I,  
650 Prehistoria y Arqueología 10: 447-478.
- 651 8. Tejera-Gaspar A (2006) Canarias y el África Antigua. San Cristóbal de La Laguna:  
652 Centro de la Cultura Popular de Canarias.
- 653 9. Springer R (2014) Die libysch-berberischen Inschriften der Kanarischen Inseln in  
654 ihrem Felsbildkontext; Stroomer H, editor. Köln: Rudiger Koppe Verlag.
- 655 10. Tejera-Gaspar A, Perera-Betancort MA (2011) Las supuestas inscripciones púnicas y  
656 neopúnicas de las Islas Canarias. Spal Revista de Prehistoria y Arqueología 20:  
657 175-184.
- 658 11. Navarro-Mederos J (1999) «El viaje de las loceras»: la transmisión de tradiciones  
659 cerámicas prehistóricas e históricas de África a Canarias y su reproducción en las  
660 islas. Anuario de Estudios Atlánticos 45: 61-118.
- 661 12. Morales J, Rodríguez-Rodríguez A, González-Marrero MC, Martín-Rodríguez E,  
662 Henríquez-Valido P, del Pino M (2014) The archaeobotany of long-term crop  
663 storage in northwest African communal granaries: a case study from pre-Hispanic



- 664 Gran Canaria (cal. ad 1000–1500). *Vegetation history and archaeobotany* 23: 789-  
665 804.
- 666 13. Hagenblad J, Morales J, Leino M, Rodriguez-Rodriguez A (2017) Farmer fidelity in  
667 the Canary Islands revealed by ancient DNA from prehistoric seeds. *Journal of*  
668 *Archaeological Science* 78: 78 - 87.
- 669 14. Ferrando A, Manunza A, Jordana J, Capote J, Pons A, Pais J, et al. (2015) A  
670 mitochondrial analysis reveals distinct founder effect signatures in Canarian and  
671 Balearic goats. *Anim Genet* 46: 452-456.
- 672 15. Olalde I, Capote J, Del-Arco MC, Atoche P, Delgado T, Gonzalez-Anton R, et al.  
673 (2015) Ancient DNA sheds light on the ancestry of pre-hispanic Canarian pigs.  
674 *Genet Sel Evol* 47: 40.
- 675 16. Guatelli-Steinberg D, Irish JD, Lukacs JR (2001) Canary islands-north African  
676 population affinities: measures of divergence based on dental morphology. *Homo*  
677 52: 173-188.
- 678 17. Bermudez De Castro JM (1989) The Carabelli trait in human prehistoric populations  
679 of the Canary Islands. *Hum Biol* 61: 117-131.
- 680 18. Bermudez de Castro JM (1989) Third molar agenesis in human prehistoric  
681 populations of the Canary Islands. *Am J Phys Anthropol* 79: 207-215.
- 682 19. Billy G (1982) Le peuplement prehistorique de l'Archipel Canarien. *El Museo*  
683 *Canario* 41: 59-74.
- 684 20. Santana-Cabrera J, Velasco-Vázquez J, Rodríguez-Rodríguez A (2012) Patrón  
685 cotidiano de actividad física y organización social del trabajo en la Gran Canaria  
686 prehistórica (siglos XI-XV): la aportación de los marcadores óseos de actividad  
687 física. *Tabona: Revista de Prehistoria y de Arqueología* 19: 125-163.
- 688 21. Atoche P, Ramirez-Rodriguez MA (2011) Nuevas dataciones radiocarbonicas para la  
689 Protohistoria canaria: el yacimiento de Buenavista (Lanzarote). *Anuario de*  
690 *Estudios Atlanticos* 57: 139-170.
- 691 22. Arco-Aguilar MC, Arco-Aguilar MM, Benito-Mateo C, Rosario-Adrian MC (2017)  
692 Un taller romano de púrpura en los limites de la Ecumene: Lobos 1. Santa Cruz de  
693 Tenerife: Cabildo de Tenerife.



- 694 23. Bronk-Ramsay C (2009) Bayesian analysis of radiocarbon dates. *Radiocarbon* 51:  
695 337-360.
- 696 24. Morales-Mateos J, Rodríguez-Rodríguez A, Herbig A (2017) Agricultura y  
697 recolección vegetal en la arqueología prehistórica de las Islas Canarias (siglos  
698 XI-XV dC): la contribución de los estudios carpológicos. In: Fernández-Eraso J,  
699 Mujika-Alustiza JA, Arrizabalaga-Valbuena A, editors. *Miscelánea en homenaje*  
700 *a Lydia Zapata Peña (1965-2015)*. Vitoria: Universidad del País Vasco/Euskal  
701 *Herriko Unibertsitatea*. pp. 189-218.
- 702 25. Hernández-Marrero J-C, Navarro-Mederos J-F, Trujillo-Mora J-M, Cancel S,  
703 Machado-Yanes C, Pais J, et al. (2016) An approach to prehistoric shepherding in  
704 La Gomera (Canary Islands) through the study of domestic spaces. *Quaternary*  
705 *International* 414: 337-349.
- 706 26. Kivisild T (2015) Maternal ancestry and population history from whole mitochondrial  
707 genomes. *Investig Genet* 6: 3.
- 708 27. Rando JC, Cabrera VM, Larruga JM, Hernandez M, Gonzalez AM, Pinto F, et al.  
709 (1999) Phylogeographic patterns of mtDNA reflecting the colonization of the  
710 Canary Islands. *Ann Hum Genet* 63: 413-428.
- 711 28. Bosch E, Calafell F, Comas D, Oefner PJ, Underhill PA, Bertranpetit J (2001) High-  
712 resolution analysis of human Y-chromosome variation shows a sharp  
713 discontinuity and limited gene flow between northwestern Africa and the Iberian  
714 Peninsula. *Am J Hum Genet* 68: 1019-1029.
- 715 29. Rando JC, Pinto F, Gonzalez AM, Hernandez M, Larruga JM, Cabrera VM, et al.  
716 (1998) Mitochondrial DNA analysis of northwest African populations reveals  
717 genetic exchanges with European, near-eastern, and sub-Saharan populations.  
718 *Ann Hum Genet* 62: 531-550.
- 719 30. Secher B, Fregel R, Larruga JM, Cabrera VM, Endicott P, Pestano JJ, et al. (2014)  
720 The history of the North African mitochondrial DNA haplogroup U6 gene flow  
721 into the African, Eurasian and American continents. *BMC evolutionary biology*  
722 14: 109.

- 723 31. Santos C, Fregel R, Cabrera VM, Gonzalez AM, Larruga JM, Lima M (2010)  
724 Mitochondrial DNA patterns in the Macaronesia islands: Variation within and  
725 among archipelagos. *Am J Phys Anthropol* 141: 610-619.
- 726 32. Santana J, Fregel R, Lightfoot E, Morales J, Alamon M, Guillen J, et al. (2016) The  
727 early colonial atlantic world: New insights on the African Diaspora from isotopic  
728 and ancient DNA analyses of a multiethnic 15th-17th century burial population  
729 from the Canary Islands, Spain. *Am J Phys Anthropol* 159: 300-312.
- 730 33. Fregel R (2010) La evolucion genetica de las poblaciones humanas canarias:  
731 determinacion mediante marcadores polimorficos y uniparentales. La Laguna:  
732 Servicio de Publicaciones de la Universidad de La Laguna.
- 733 34. Farrujía de la Rosa AJ, Pichler W, Rodrigue A, Garcia-Marin S (2010) The Libyco-  
734 Berber and Latino-Canarian Scripts and the Colonization of the Canary Islands.  
735 *African Archaeology Review* 27: 13-41.
- 736 35. Flores C, Maca-Meyer N, Perez JA, Gonzalez AM, Larruga JM, Cabrera VM (2003)  
737 A predominant European ancestry of paternal lineages from Canary Islanders.  
738 *Ann Hum Genet* 67: 138-152.
- 739 36. Maca-Meyer N, Arnay M, Rando JC, Flores C, Gonzalez AM, Cabrera VM, et al.  
740 (2004) Ancient mtDNA analysis and the origin of the Guanches. *Eur J Hum*  
741 *Genet* 12: 155-162.
- 742 37. Fregel R, Pestano J, Arnay M, Cabrera VM, Larruga JM, Gonzalez AM (2009) The  
743 maternal aborigine colonization of La Palma (Canary Islands). *Eur J Hum Genet*  
744 17: 1314-1324.
- 745 38. Fregel R, Cabrera VM, Larruga JM, Hernandez JC, Gamez A, Pestano JJ, et al.  
746 (2015) Isolation and prominent aboriginal maternal legacy in the present-day  
747 population of La Gomera (Canary Islands). *Eur J Hum Genet* 23: 1236-1243.
- 748 39. Ordóñez AC, Fregel R, Trujillo-Mederos A, Hervella M, de-la-Rúa C, Arnay-de-la-  
749 Rosa M (2017) Genetic studies on the prehispanic population buried in Punta  
750 Azul cave (El Hierro, Canary Islands). *Journal of Archaeological Science* 78: 20-  
751 28.
- 752 40. O'Rourke DH, Hayes MG, Carlyle SW (2000) Ancient DNA studies in physical  
753 anthropology. *Annual Review of Anthropology* 29: 217-242.

- 754 41. Rodriguez-Varela R, Gunther T, Krzewinska M, Stora J, Gillingwater TH,  
755 MacCallum M, et al. (2017) Genomic Analyses of Pre-European Conquest  
756 Human Remains from the Canary Islands Reveal Close Affinity to Modern North  
757 Africans. *Curr Biol* 27: 3396-3402 e3395.
- 758 42. Carpenter ML, Buenrostro JD, Valdiosera C, Schroeder H, Allentoft ME, Sikora M,  
759 et al. (2013) Pulling out the 1%: Whole-Genome Capture for the Targeted  
760 Enrichment of Ancient DNA Sequencing Libraries. *American Journal of Human*  
761 *Genetics* 93: 852-864.
- 762 43. Arnay-De-La-Rosa M, González-Reimers E, Yanes Y, Romanek CS, Noakes JE,  
763 Galindo-Martín L (2011) Paleonutritional and paleodietary survey on prehistoric  
764 humans from Las Cañadas del Teide (Tenerife, Canary Islands) based on  
765 chemical and histological analysis of bone. *Journal of Archaeological Science* 38:  
766 884-895.
- 767 44. Espinosa A (1980) *Del origen y milagros de la Santa Imagen de Nuestra Señora de*  
768 *Candelaria que apareció en la Isla de Tenerife con la descripción de esta Isla.*  
769 *Santa Cruz de Tenerife: Ediciones Goya.*
- 770 45. Pinhasi R, Fernandes D, Sirak K, Novak M, Connell S, Alpaslan-Roodenberg S, et al.  
771 (2015) Optimal Ancient DNA Yields from the Inner Ear Part of the Human  
772 Petrous Bone. *PLoS One* 10: e0129102.
- 773 46. Dabney J, Knapp M, Glocke I, Gansauge MT, Weihmann A, Nickel B, et al. (2013)  
774 Complete mitochondrial genome sequence of a Middle Pleistocene cave bear  
775 reconstructed from ultrashort DNA fragments. *Proc Natl Acad Sci U S A* 110:  
776 15758-15763.
- 777 47. Meyer M, Kircher M (2010) Illumina sequencing library preparation for highly  
778 multiplexed target capture and sequencing. *Cold Spring Harb Protoc* 2010: pdb  
779 prot5448.
- 780 48. Fregel R, Almeida M, Betancor E, Suarez NM, Pestano J (2011) Reliable nuclear and  
781 mitochondrial DNA quantification for low copy number and degraded forensic  
782 samples. *Forensic Science International: Genetics Supplement Series* 3: e303-  
783 e304.

- 784 49. Gonzalez AM, Cabrera VM, Larruga JM, Tounkara A, Noumsi G, Thomas BN, et al.  
785 (2006) Mitochondrial DNA variation in Mauritania and Mali and their genetic  
786 relationship to other Western Africa populations. *Ann Hum Genet* 70: 631-657.
- 787 50. Lindgreen S (2012) AdapterRemoval: easy cleaning of next-generation sequencing  
788 reads. *BMC Res Notes* 5: 337.
- 789 51. Li H, Durbin R (2009) Fast and accurate short read alignment with Burrows-Wheeler  
790 transform. *Bioinformatics* 25: 1754-1760.
- 791 52. Li H, Handsaker B, Wysoker A, Fennell T, Ruan J, Homer N, et al. (2009) The  
792 Sequence Alignment/Map format and SAMtools. *Bioinformatics* 25: 2078-2079.
- 793 53. Ginolhac A, Rasmussen M, Gilbert MT, Willerslev E, Orlando L (2011)  
794 mapDamage: testing for damage patterns in ancient DNA sequences.  
795 *Bioinformatics* 27: 2153-2155.
- 796 54. R\_Development\_Core\_Team (2008) A language and environment for statistical  
797 computing. R Foundation for Statistical Computing. Vienna, Austria. ISBN 3-  
798 900051-07-0, URL <http://www.R-project.org>.
- 799 55. Fu Q, Mittnik A, Johnson PL, Bos K, Lari M, Bollongino R, et al. (2013) A revised  
800 timescale for human evolution based on ancient mitochondrial genomes. *Current*  
801 *biology* : CB 23: 553-559.
- 802 56. Renaud G, Slon V, Duggan AT, Kelso J (2015) Schmutzi: estimation of  
803 contamination and endogenous mitochondrial consensus calling for ancient DNA.  
804 *Genome Biol* 16: 224.
- 805 57. Andrews RM, Kubacka I, Chinnery PF, Lightowlers RN, Turnbull DM, Howell N  
806 (1999) Reanalysis and revision of the Cambridge reference sequence for human  
807 mitochondrial DNA. *Nat Genet* 23: 147.
- 808 58. DePristo MA, Banks E, Poplin R, Garimella KV, Maguire JR, Hartl C, et al. (2011) A  
809 framework for variation discovery and genotyping using next-generation DNA  
810 sequencing data. *Nat Genet* 43: 491-498.
- 811 59. Kloss-Brandstatter A, Pacher D, Schonherr S, Weissensteiner H, Binna R, Specht G,  
812 et al. (2011) HaploGrep: a fast and reliable algorithm for automatic classification  
813 of mitochondrial DNA haplogroups. *Hum Mutat* 32: 25-32.

- 814 60. van Oven M, Kayser M (2009) Updated comprehensive phylogenetic tree of global  
815 human mitochondrial DNA variation. *Hum Mutat* 30: E386-394.
- 816 61. Milne I, Stephen G, Bayer M, Cock PJA, Pritchard L, Cardle L, et al. (2013) Using  
817 Tablet for visual exploration of second-generation sequencing data. *Briefings in*  
818 *Bioinformatics* 14: 193-202.
- 819 62. Bandelt HJ, Forster P, Rohl A (1999) Median-joining networks for inferring  
820 intraspecific phylogenies. *Mol Biol Evol* 16: 37-48.
- 821 63. Forster P, Harding R, Torroni A, Bandelt HJ (1996) Origin and evolution of Native  
822 American mtDNA variation: a reappraisal. *Am J Hum Genet* 59: 935-945.
- 823 64. Soares P, Ermini L, Thomson N, Mormina M, Rito T, Rohl A, et al. (2009)  
824 Correcting for purifying selection: an improved human mitochondrial molecular  
825 clock. *Am J Hum Genet* 84: 740-759.
- 826 65. Saillard J, Forster P, Lynnerup N, Bandelt HJ, Norby S (2000) mtDNA variation  
827 among Greenland Eskimos: the edge of the Beringian expansion. *Am J Hum*  
828 *Genet* 67: 718-726.
- 829 66. Hall TA (1999) BioEdit: a user-friendly biological sequence alignment editor and  
830 analysis program for Windows 95/98/NT. *Nucleic acids symposium series* 41: 95-  
831 98.
- 832 67. Fregel R, Delgado S (2011) HaploSearch: a tool for haplotype-sequence two-way  
833 transformation. *Mitochondrion* 11: 366-367.
- 834 68. Nei N (1987) *Molecular evolutionary genetics*. New York: Columbia University  
835 Press.
- 836 69. Slatkin M (1995) A measure of population subdivision based on microsatellite allele  
837 frequencies. *Genetics* 139: 457-462.
- 838 70. Excoffier L, Lischer HEL (2010) Arlequin suite ver 3.5: A new series of programs to  
839 perform population genetics analyses under Linux and Windows. *Mol Ecol*  
840 *Resour* 10: 564-567.
- 841 71. de Leeuw J, Mair P (2009) Multidimensional Scaling Using Majorization: SMACOF  
842 in R. *Journal of Statistical Software* 31: 1-30.
- 843 72. Long JC (1991) The genetic structure of admixed populations. *Genetics* 127: 417-  
844 428.

- 845 73. Fregel R, Mendez FL, Bokbot Y, Martin-Socas D, Camalich-Massieu MD, Santana J,  
846 et al. (2018) Ancient genomes from North Africa evidence prehistoric migrations  
847 to the Maghreb from both the Levant and Europe. Proc Natl Acad Sci U S A in  
848 press.
- 849 74. Heinz T, Cardenas JM, Alvarez-Iglesias V, Pardo-Seco J, Gomez-Carballa A, Santos  
850 C, et al. (2015) The Genomic Legacy of the Transatlantic Slave Trade in the  
851 Yungas Valley of Bolivia. PLoS One 10: e0134129.
- 852 75. Bandelt HJ, Herrnstadt C, Yao YG, Kong QP, Kivisild T, Rengo C, et al. (2003)  
853 Identification of Native American Founder mtDNAs Through the Analysis of  
854 Complete mtDNA Sequences: Some Caveats. Annals of Human Genetics 67:  
855 512--524.
- 856 76. Cabrera-Pérez J, Perera-Betancort MA, Tejera-Gaspar A (1999) Majos La primitiva  
857 población de Lanzarote. Islas Canarias. Tegui: Fundación César Manrique.
- 858 77. Macias-Hernandez AM (1988) Fuentes y principales problemas metodológicos de la  
859 demografía histórica de Canarias. Anuario de Estudios Atlánticos 34: 51-157.
- 860 78. Navarro JF (1992) La Prehistoria de Canarias. Vol. 5. La Gomera y Los Gomeros.  
861 Santa Cruz de Tenerife: Centro de la Cultura Popular Canaria.
- 862 79. Ruiz-Gonzalez MT (2008) El territorio de los antiguos bimbaches / Algunas  
863 cuestiones en torno al territorio de Esero. VI Congreso de Patrimonio Histórico:  
864 'Arqueología en Canarias, Territorio y Sociedad'. Lanzarote: Cabildo Insular de  
865 Lanzarote.
- 866 80. Jimenez JJ (1992) La Prehistoria de Canarias. Vol. 6. El Hierro y los Bimbaches.  
867 Santa Cruz de Tenerife: Centro de la Cultura Popular Canaria.
- 868 81. Pico B, Aznar E, Corbella D (2003) Le Canarien. Manuscritos, transcripción y  
869 traducción, La Laguna. Santa Cruz de Tenerife: Instituto de Estudios Canarios.
- 870 82. van de Loosdrecht M, Bouzouggar A, Humphrey L, Posth C, Barton N, Aximu-Petri  
871 A, et al. (2018) Pleistocene North African genomes link Near Eastern and sub-  
872 Saharan African human populations. Science.
- 873 83. Souville G (1998) Contacts et échanges entre la péninsule Ibérique et le Nord-Ouest  
874 de l'Afrique durant les temps préhistoriques et protohistoriques. Comptes rendus  
875 des séances de l'Académie des Inscriptions et Belles-Lettres. pp. 163-177.

- 876 84. Camps G (1974) La civilisations préhistoriques de l'Afrique du Nord et du Sahara.  
877 Paris: Doin.
- 878 85. Clark JD (1997) The Cambridge History of Africa,1. From the earliest times to c.  
879 500BC. Cambridge: Cambridge University Press.
- 880 86. Aubet ME (1994) Tiro y las colonias fenicias de Occidente. Barcelona: Crítica.
- 881 87. Lopez-Pardo F (1993) La colonización fenicio-púnica en el África noroccidental.  
882 Hispania Antiqua 17: 435-449.
- 883 88. Le Bohec Y (2005) Histoire de l'Afrique romaine (146 avant J.C. - 439 après J. C.).  
884 Paris: Picard.
- 885 89. Camps G (1980) Berberes: aux marges de l'histoire. Paris: Hesperides.
- 886 90. Tejera-Gaspar A (1989) Parentesco, familia y matrimonio en las culturas  
887 prehistóricas de las Islas Canarias. In: Bermejo JC, editor. Parentesco, familia y  
888 matrimonio en la historia de Galicia. Santiago de Compostela: Torculo Ediciones.
- 889 91. Atoche P, Paz JA, Ramirez MA, Ortiz ME (1995) Evidencias arqueológicas del  
890 mundo romano en Lanzarote. Arrecife: Servicio de publicaciones del Excmo.  
891 Cabildo Insular de Lanzarote.
- 892 92. Delgado-Delgado JA (2001) Las islas de Juno: ¿hitos de la navegación fenicia en el  
893 Atlántico en época arcaica? The Ancient History Bulletin 15: 29-43.
- 894 93. Delgado-Delgado JA (2012) Canarias en la antigüedad como problema histórico.  
895 Tabona: Revista de Prehistoria y de Arqueología 19: 9-13.
- 896 94. Raven S (2003) Rome in Africa. London: Routledge.
- 897 95. Gonzalez-Anton R, del Arco-Aguilar MC, Berhmann RB, Bueno-Ramírez P (1998)  
898 El poblamiento de un archipiélago Atlántico: Canarias en el proceso colonizador  
899 del primer milenio a. C. Eres 8: 43-100.
- 900 96. González-Antón R, Del Arco-Aguilar MC (2009) Navegaciones exploratorias en  
901 Canarias a finales del II milenio AC e inicios del primero: El cordón litoral de La  
902 Graciosa (Lanzarote). Canarias Arqueológica: Arqueología-Bioantropología 17:  
903 9-80.
- 904 97. Guerrero-Ayuso VM (2008) Canarias en el contexto de las navegaciones atlánticas de  
905 la Antigüedad. SAGVNTVM Papeles del Laboratorio de Arqueología 40: 37-62.



- 906 98. Matisoo-Smith EA, Gosling AL, Boocock J, Kardailsky O, Kurumilian Y, Roudesli-  
907 Chebbi S, et al. (2016) A European Mitochondrial Haplotype Identified in  
908 Ancient Phoenician Remains from Carthage, North Africa. PLoS One 11:  
909 e0155046.
- 910 99. Matisoo-Smith E, Gosling AL, Platt D, Kardailsky O, Prost S, Cameron-Christie S, et  
911 al. (2018) Ancient mitogenomes of Phoenicians from Sardinia and Lebanon: A  
912 story of settlement, integration, and female mobility. PLoS One 13: e0190169.
- 913 100. Delgado-Darias T, Alberto-Barroso V, Velasco-Vazquez J (2018) Violence in  
914 paradise: Cranial trauma in the prehispanic population of Gran Canaria (Canary  
915 Islands). Am J Phys Anthropol.
- 916 101. Delgado T (2009) La Historia en los dientes. Una aproximación a la Prehistoria de  
917 Gran Canaria desde la Antropología Dental. Las Palmas: Cabildo Insular de Gran  
918 Canaria.
- 919 102. Rodriguez-Rodriguez A, Morales-Mateos J, Pino-Curbelo MD, Naranjo-Mayor Y,  
920 Martín-Rodriguez E, González-Marrero MC (2012) Espacios de producción  
921 especializada, excedentes y estratificación social en la Gran Canaria pre-europea.  
922 Tabona: Revista de Prehistoria y de Arqueología 19: 101-123.
- 923 103. Morales J, Rodriguez-Rodriguez A, Marrero A (2013) Prehistoric Plant Use on La  
924 Palma Island (Canary Islands, Spain): an example of disappearance of agriculture  
925 in an isolated environment. In: Stevens GJ, Nixon S, Murray MA, Fuller D,  
926 editors. Archaeology of African Plant Use. California: Institute of Archaeology  
927 Publications, UCL. pp. 195-204.
- 928 104. Moreno-Benítez M (2014) Tiempo y espacio: La cronología de Gran Canaria y el  
929 territorio. Boletín electrónico de Patrimonio Histórico 2.
- 930 105. del Pino-Curbelo M, Rodriguez-Rodriguez A, Buxeda-Garrigos J, Mangas-Viñuela  
931 J, González-Quintero P, Moreno-Benítez MA (2016) Las cerámicas aborígenes de  
932 Gran Canaria (Islas Canarias) a través del yacimiento de La Cerera: materias  
933 primas, tecnología y función. Trabajos de Prehistoria 73: 90-114.
- 934 106. Santana-Cabrera J, Moreno-Benítez M, Suarez-Medina I, Mendoza-Medina F,  
935 Alberto-Barroso V (2018) Zonzamas: un yacimiento singular en la isla de  
936 Lanzarote. Nuevos datos arqueológicos. Actas del XXII Coloquio de Historia



- 937           Canario Americana. Las Palmas de Gran Canaria: Cabildo de Gran Canaria. pp.  
938           1-14.
- 939   107. Cabrera-Pérez JC (1996) La Prehistoria de Fuerteventura. Un modelo insular de  
940           adaptación. Las Palmas de Gran Canaria: Cabildo Insular de Gran Canaria y  
941           Fuerteventura.  
942  
943

944 **TABLES:**

945 **Table 1 – MtDNA haplogroup absolute frequencies for the indigenous population of**  
 946 **the Canary Islands.** Haplogroup frequencies and diversity were calculated using HVRI  
 947 sequence data from this study and previously published data. 1: This study; 2: Ordoñez et  
 948 al. 2017; 3: Fregel et al. 2009; 4: Maca-Meyer et al. 2004; 5: Fregel et al. 2014; 6:  
 949 Rodríguez-Varela et al. 2017.

950

| Haplogroup           | El Hierro <sup>1,2</sup> | La Palma <sup>1,3</sup> | Tenerife <sup>1,4,6</sup> | La Gomera <sup>1,5</sup> | Gran Canaria <sup>1,6</sup> | Lanzarote & Fuerteventura <sup>1</sup> | Total          |
|----------------------|--------------------------|-------------------------|---------------------------|--------------------------|-----------------------------|----------------------------------------|----------------|
| H*                   | 12                       | 10                      | 15                        | 2                        | 33                          | 13                                     | 85             |
| H1cf                 | 57                       | 8                       | 6                         | 2                        | 1                           | -                                      | 74             |
| H4a1e                | -                        | -                       | -                         | -                        | 3                           | 1                                      | 4              |
| HV0                  | -                        | -                       | 1                         | -                        | -                           | -                                      | 1              |
| J                    | -                        | 3                       | 4                         | 5                        | 2                           | -                                      | 14             |
| K                    | -                        | 1                       | 1                         | 1                        | 2                           | -                                      | 5              |
| L1/L2                | -                        | 2                       | 2                         | 1                        | 1                           | -                                      | 6              |
| L3                   | -                        | -                       | 2                         | 4                        | 1                           | -                                      | 7              |
| L3b1a12              | -                        | -                       | -                         | -                        | 5                           | -                                      | 5              |
| HV0                  | -                        | -                       | -                         | -                        | 1                           | -                                      | 1              |
| Other T              | -                        | 1                       | -                         | -                        | 3                           | -                                      | 4              |
| T2c1                 | -                        | 3                       | 12                        | -                        | 15                          | 2                                      | 32             |
| U5                   | -                        | -                       | -                         | -                        | 3                           | 1                                      | 4              |
| U6a                  | -                        | -                       | 2                         | -                        | 6                           | 2                                      | 10             |
| U6b                  | -                        | 2                       | 8                         | 38                       | 4                           | -                                      | 52             |
| U6c                  | -                        | -                       | -                         | -                        | 5                           | 1                                      | 6              |
| U7                   | 1                        | -                       | -                         | -                        | -                           | -                                      | 1              |
| W1e1                 | -                        | 1                       | -                         | -                        | -                           | -                                      | 1              |
| X3a                  | -                        | 4                       | -                         | 4                        | 1                           | -                                      | 9              |
| Sample size          | 70                       | 35                      | 53                        | 57                       | 86                          | 20                                     | 321            |
| Haplogroup diversity | 2.86% ± 2.76%            | 72.10% ± 7.63%          | 77.43% ± 4.02%            | 54.20% ± 7.50%           | 77.10% ± 3.78%              | 51.05% ± 12.84%                        | 69.69% ± 2.37% |

951

952 **Table 2 – Admixture results based on mtDNA haplogroup frequencies.** Admixture  
 953 results for the modern population of the Canary Islands using the three main parental  
 954 populations: Iberian Peninsula (IBP), sub-Saharan Africa (SSA) and the Canarian  
 955 indigenous population (CIP). Admixture calculations were performed using two  
 956 approximations: A) we used the whole ancient dataset (combining the ancient samples  
 957 from all the seven islands) as CIP for calculating admixture estimates for all islands; B)  
 958 we used each indigenous sample to calculate the admixture of its respective island (e.g. to  
 959 calculate admixture in the modern population of Gran Canaria we exclusively used the  
 960 ancient samples from Gran Canaria as CIP). Results are shown for: the whole Canary  
 961 Islands population (CAN) and the seven individual islands (FUE=Fuerteventura;  
 962 GCA=Gran Canaria; GOM=La Gomera; HIE=El Hierro; LAN=Lanzarote; PAL=La  
 963 Palma; TFE=Tenerife).  
 964

| <b>A: Whole indigenous sample</b>            |            |   |        |            |   |        |            |   |        |
|----------------------------------------------|------------|---|--------|------------|---|--------|------------|---|--------|
| <b>Component</b>                             | <b>IBP</b> |   |        | <b>SSA</b> |   |        | <b>CIP</b> |   |        |
| <b>FUE</b>                                   | 0.4108     | ± | 0.0071 | 0.0199     | ± | 0.0015 | 0.5692     | ± | 0.0070 |
| <b>GCA</b>                                   | 0.6486     | ± | 0.0039 | 0.0438     | ± | 0.0012 | 0.3076     | ± | 0.0038 |
| <b>GOM</b>                                   | 0.2170     | ± | 0.0181 | 0.0691     | ± | 0.0075 | 0.7139     | ± | 0.0186 |
| <b>HIE</b>                                   | 0.6379     | ± | 0.0122 | 0.0000     | ± | 0.0000 | 0.3621     | ± | 0.0122 |
| <b>LAN</b>                                   | 0.3303     | ± | 0.0084 | 0.0448     | ± | 0.0026 | 0.6248     | ± | 0.0084 |
| <b>PAL</b>                                   | 0.5599     | ± | 0.0106 | 0.0000     | ± | 0.0001 | 0.4401     | ± | 0.0107 |
| <b>TFE</b>                                   | 0.5989     | ± | 0.0041 | 0.0452     | ± | 0.0012 | 0.3559     | ± | 0.0040 |
| <b>CAN</b>                                   | 0.3978     | ± | 0.0100 | 0.0432     | ± | 0.0029 | 0.5589     | ± | 0.0100 |
| <b>B: Indigenous sample from each island</b> |            |   |        |            |   |        |            |   |        |
| <b>Component</b>                             | <b>IBP</b> |   |        | <b>SSA</b> |   |        | <b>CIP</b> |   |        |
| <b>FUE</b>                                   | 0.6458     | ± | 0.0095 | 0.0203     | ± | 0.0020 | 0.3339     | ± | 0.0093 |
| <b>GCA</b>                                   | 0.6944     | ± | 0.0040 | 0.0593     | ± | 0.0015 | 0.2463     | ± | 0.0038 |
| <b>GOM</b>                                   | 0.3768     | ± | 0.0049 | 0.0682     | ± | 0.0024 | 0.5550     | ± | 0.0049 |
| <b>HIE</b>                                   | 1.0000     | ± | 0.0087 | 0.0000     | ± | 0.0000 | 0.0000     | ± | 0.0087 |
| <b>LAN</b>                                   | 0.7202     | ± | 0.0116 | 0.0239     | ± | 0.0027 | 0.2559     | ± | 0.0113 |
| <b>PAL</b>                                   | 0.5896     | ± | 0.0134 | 0.0000     | ± | 0.0116 | 0.4104     | ± | 0.0118 |
| <b>TFE</b>                                   | 0.7306     | ± | 0.0030 | 0.0495     | ± | 0.0012 | 0.2199     | ± | 0.0029 |

965  
 966  
 967

968 **TITLES AND LEGENDS TO FIGURES:**

969 **Figure 1 – Map of the Canary Islands showing the geographical location of the**  
970 **archaeological sites included in this study.** Codes are as follows: 1 – Cueva del Agua; 2  
971 – Huerto de los Morales; 3 – Salto del Casimiro; 4 – El Espigón; 5 – Los Pasitos; 6 –  
972 Punta Azul; 7 – Barranco de Majona; 8 – El Pescante; 9 – Antoncojo; 10 – Las Arenas;  
973 11 – El Cedro; 12 – El Salitre; 13 – El Portillo; 14 – La Angostura; 15 – El Cascajo; 16 –  
974 El Capricho; 17 – El Agujero; 18 – El Hormiguero; 19 – Guayadeque; 20 – La Fortaleza;  
975 21 – Cuermeja; 22 – Lomo Galeón; 23 – Puente de la Calzada; 24 – El Huriamen; 25 –  
976 Montaña Mina.

977 **Figure 2 – DNA authentication results for all the samples included in this study.** A)  
978 Insert size density plot. B) Contamination rates estimated using contamMix and  
979 schmutzi. C) Damage patterns.

980 **Figure 3 – MtDNA haplogroup frequencies for ancient and current populations of**  
981 **the Canary Islands.**

982 **Figure 4 – MDS plot based on haplogroup frequency distances.** A) MDS analysis  
983 comparing the individual ancient populations (FUI=Fuerteventura; GCI=Gran Canaria;  
984 GOI=La Gomera; HII=El Hierro; LAI=Lanzarote; PAI=La Palma; TFI=Tenerife), with  
985 modern Canarian (codes as in Table 2), Caucasus (CAU), North African (codes as in  
986 Table S1), Sub-Saharan African (SSA), European (codes as in Table S1) and Near  
987 Eastern populations (codes as in Table S2). B) MDS analysis as in Figure 4A, but  
988 removing outliers (HIE, HII and GOM) and pooling all the remaining indigenous samples  
989 together (CIP).

990

991

992 **TITLES AND LEGENDS TO SUPPLEMENTARY MATERIAL:**

993 **Table S1 –Populations used for comparisons in this study.**

994 **Table S2 – Summary of mtDNA results for all aDNA samples.**

995 **Table S3 – HVRI data used for this study, including new results on the islands of**  
996 **Gran Canaria, Lanzarote and Fuerteventura.**

997 **Figure S1 – Combined calibrated radiocarbon per archaeological site (A) and per**  
998 **mtDNA lineage (B).**

999 **Figure S2 – Phylogenetic tree of complete ancient Canarian mtDNA sequences.**

1000 Number along links refers to nucleotide changes, whereas “@”, “d” and “i” indicates  
1001 back mutations, deletions and insertions, respectively. Recurrent mutations, such as  
1002 309iC, 315iC and 16519, have not been taken into account.

1003 **Figure S3 – Phylogenetic tree of complete modern Canary Islands sequences.** The  
1004 most probable geographic origin of the sequences is indicated.

1005 **Figure S4 – Phylogenetic tree of complete haplogroup H1cf sequences.** GenBank  
1006 accessions and geographic origin are indicated for each complete sequence taken from  
1007 the bibliography.

1008 **Figure S5 – Coalescence ages for mtDNA haplogroups observed in the indigenous**  
1009 **population of the Canary Islands.** All the coalescence ages have been calculated in this  
1010 study, except for H2a, H3 and T2b, whose ages have been obtained from previous results  
1011 (Behar et al. 2008).

1012 **Figure S6 – Phylogenetic tree of complete haplogroup H1e1a sequences.** GenBank  
1013 accessions and geographic origin are indicated for each complete sequence taken from  
1014 the bibliography. Sub-haplogroups in dark grey and white fonts indicate newly defined  
1015 branches.

1016 **Figure S7 – Phylogenetic tree of complete haplogroup H4a1 sequences.** GenBank  
1017 accessions and geographic origin are indicated for each complete sequence taken from  
1018 the bibliography. Sub-haplogroups in dark grey and white fonts indicate newly defined  
1019 branches.

1020 **Figure S8 – Phylogenetic tree of complete haplogroup J1c3 sequences.** GenBank  
1021 accessions and geographic origin are indicated for each complete sequence taken from  
1022 the bibliography.

1023 **Figure S9 – Phylogenetic tree of complete haplogroup J2a2d sequences.** GenBank  
1024 accessions and geographic origin are indicated for each complete sequence taken from  
1025 the bibliography. Sub-haplogroups in dark grey and white fonts indicate newly defined  
1026 branches.

1027 **Figure S10 – Phylogenetic tree of complete haplogroup T2c1d sequences.** GenBank  
1028 accessions and geographic origin are indicated for each complete sequence taken from  
1029 the bibliography. Sub-haplogroups in dark grey and white fonts indicate newly defined  
1030 branches.

1031 **Figure S11 – Phylogenetic tree of complete haplogroup L3b1a sequences.** GenBank  
1032 accessions and geographic origin are indicated for each complete sequence taken from  
1033 the bibliography. Sub-haplogroups in dark grey and white fonts indicate newly defined  
1034 branches.

1035 **Figure S12 – Phylogenetic tree of complete haplogroup X3a sequences.** GenBank  
1036 accessions and geographic origin are indicated for each complete sequence taken from  
1037 the bibliography.

1038 **Figure S13 – Phylogenetic tree of complete haplogroup U6a1a1 sequences.** GenBank  
1039 accessions and geographic origin are indicated for each complete sequence taken from  
1040 the bibliography.

1041 **Figure S14 – Phylogenetic tree of complete haplogroup U6a7a1 sequences.** GenBank  
1042 accessions and geographic origin are indicated for each complete sequence taken from  
1043 the bibliography.

1044 **Figure S15 – Phylogenetic tree of complete haplogroup U6b1a sequences.** GenBank  
1045 accessions and geographic origin are indicated for each complete sequence taken from  
1046 the bibliography.

1047 **Figure S16 – Phylogenetic tree of complete haplogroup U6c sequences.** GenBank  
1048 accessions and geographic origin are indicated for each complete sequence taken from  
1049 the bibliography.

1050

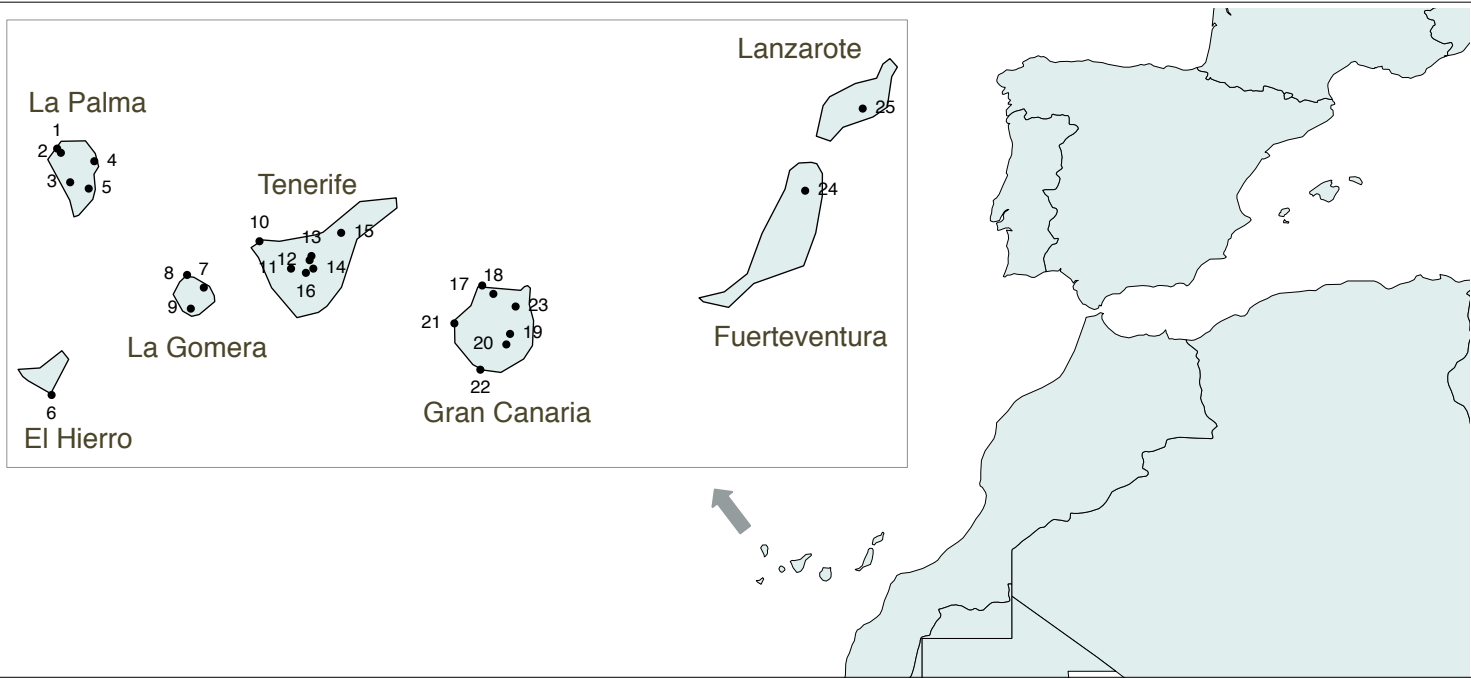

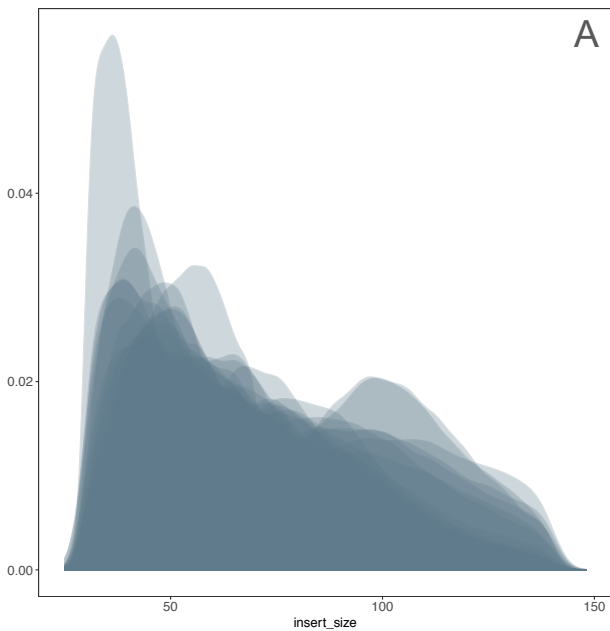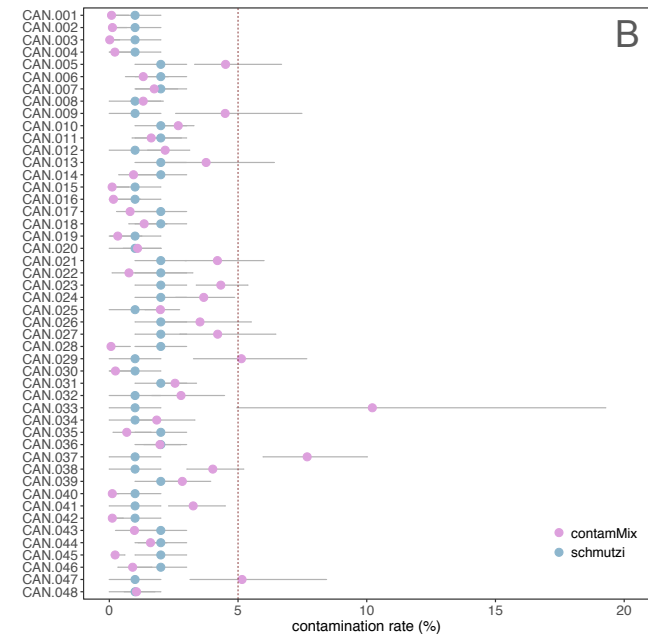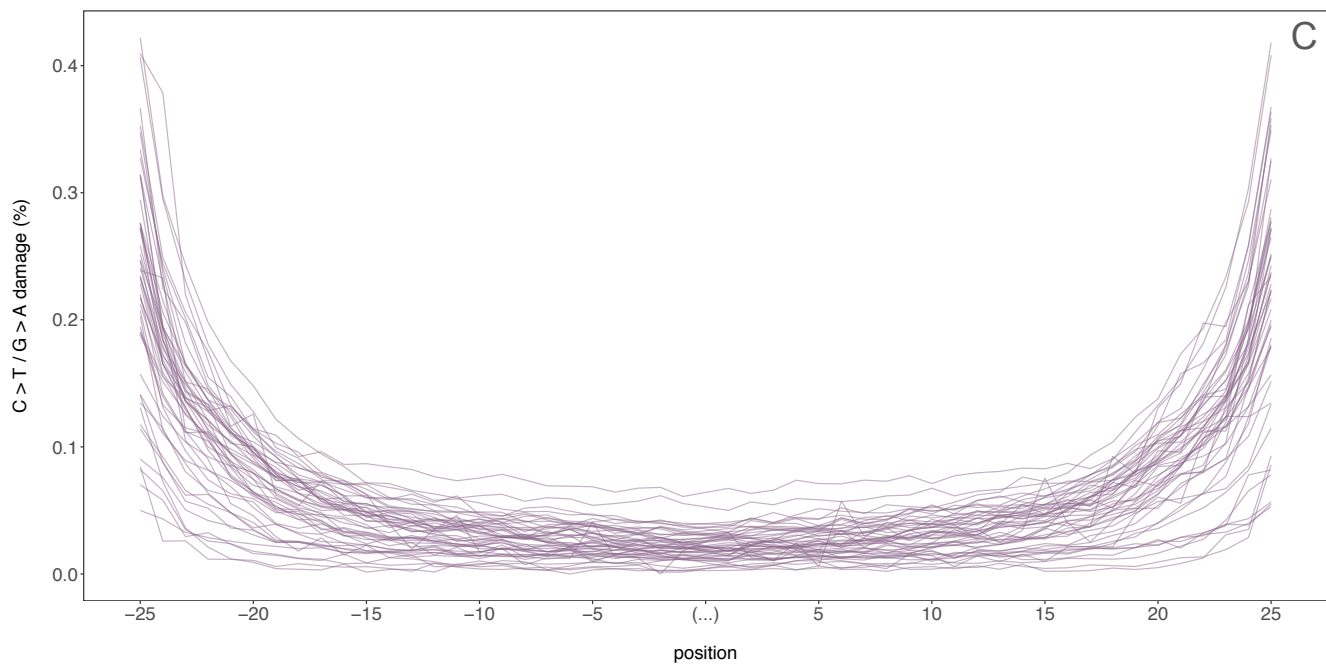



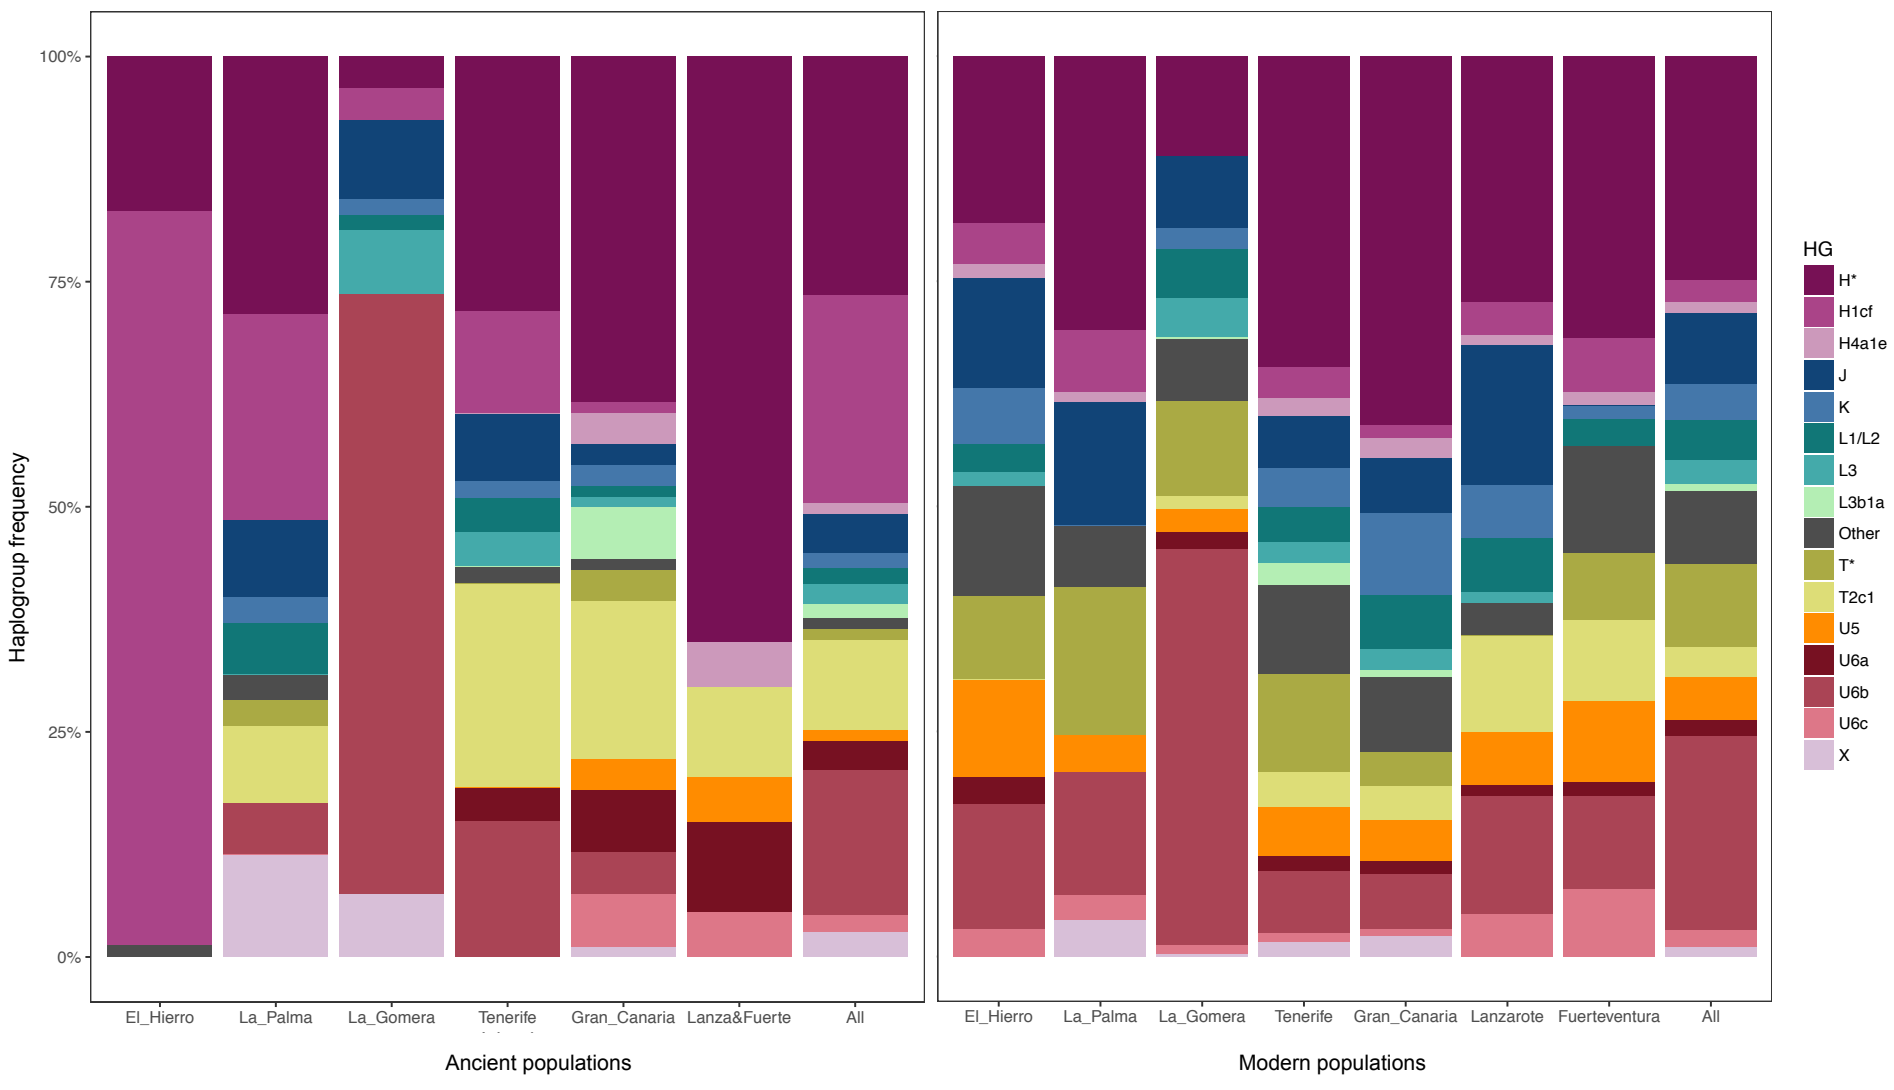

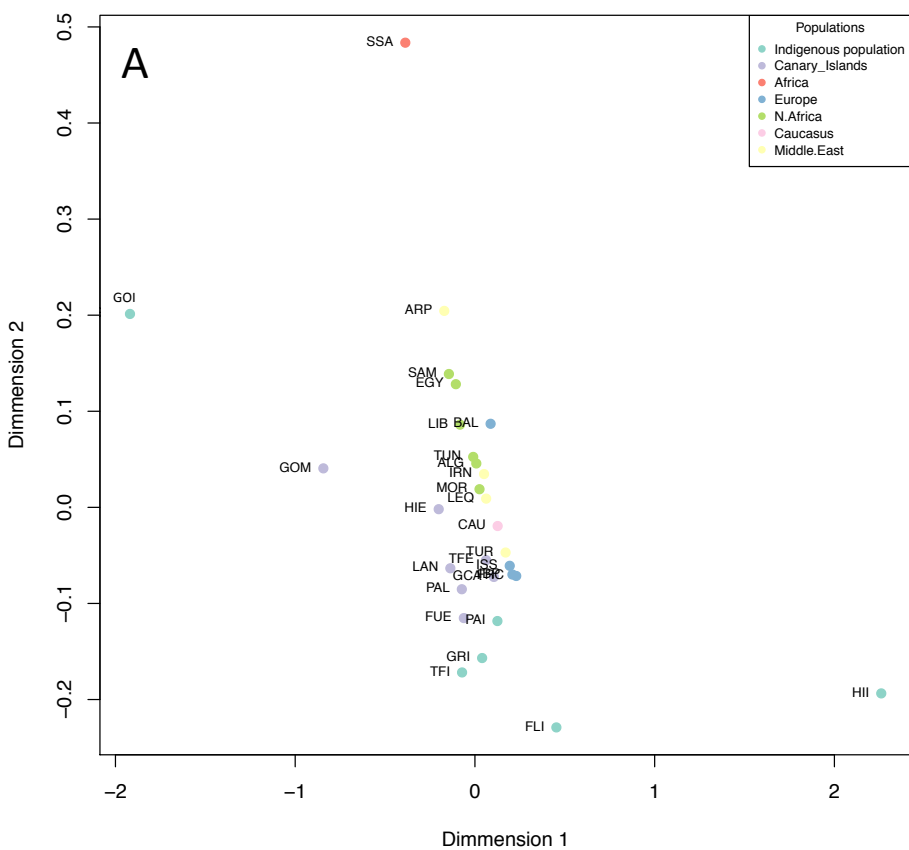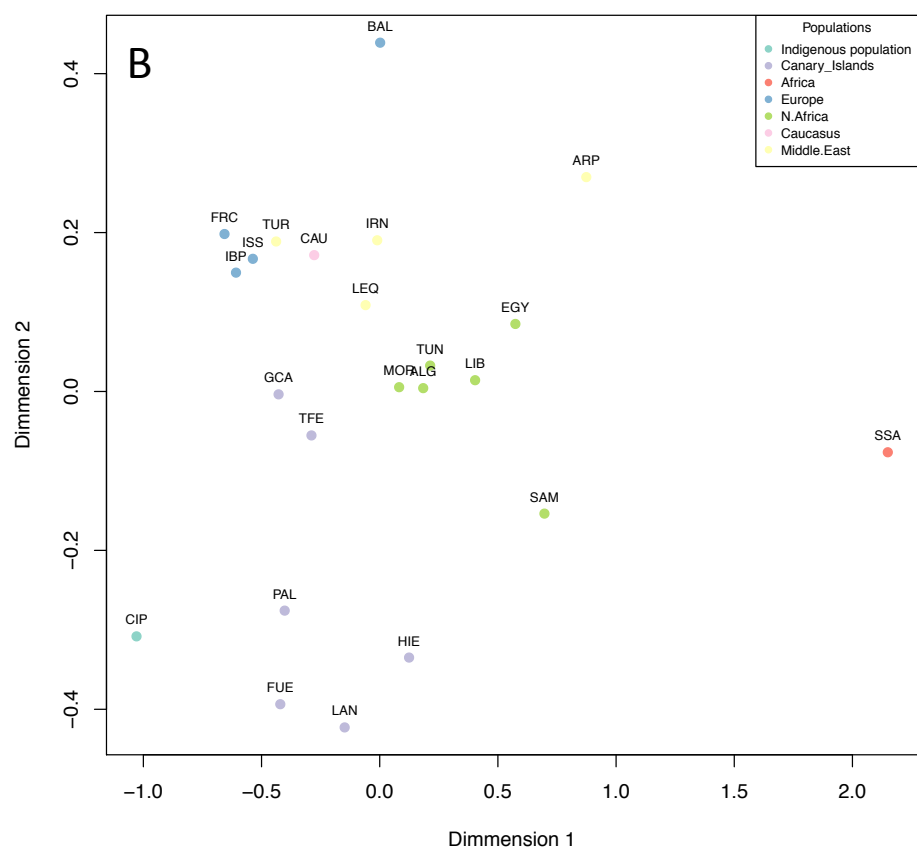

Source: https://www.biorxiv.org/content/10.1101/486142v2.full.pdf
